# Supplementary material for: Paternal body mass index and offspring DNA methylation: findings from the PACE consortium
Source: Oxford University Press journal article supplement (doi:10.1093/ije/dyaa267), 2020-12-07

## Sensitivity analyses: birth

For each model, at CpGs with  $P < 1e-5$ , we conducted a leave-one-out analysis (systematically leaving one cohort at a time out of the meta-analysis) and plotted the resulting effect estimate and 95% confidence interval.

### Contents:

- Paternal BMI (unadjusted for maternal BMI): pages 3-4
- Paternal BMI (adjusted for maternal BMI): pages 6-7
- Paternal BMI adjusted for maternal BMI – female offspring only: pages 9-10
- Paternal BMI adjusted for maternal BMI – male offspring only: page 12
  
- Maternal BMI (unadjusted for paternal BMI): pages 14-20
- Maternal BMI (adjusted for paternal BMI): pages 22-27
- Maternal BMI adjusted for paternal BMI – female offspring only: pages 29-31
- Maternal BMI adjusted for paternal BMI – male offspring only: pages 33-34

Paternal BMI (unadjusted for maternal BMI): pages 3-4

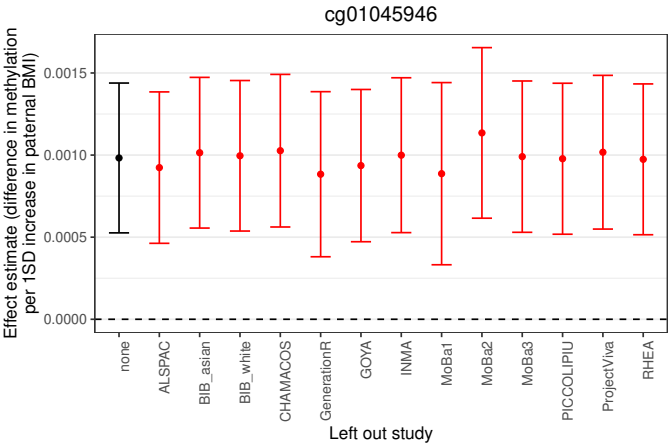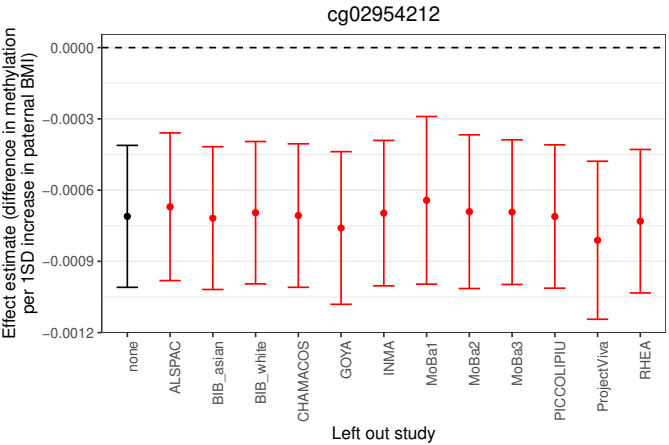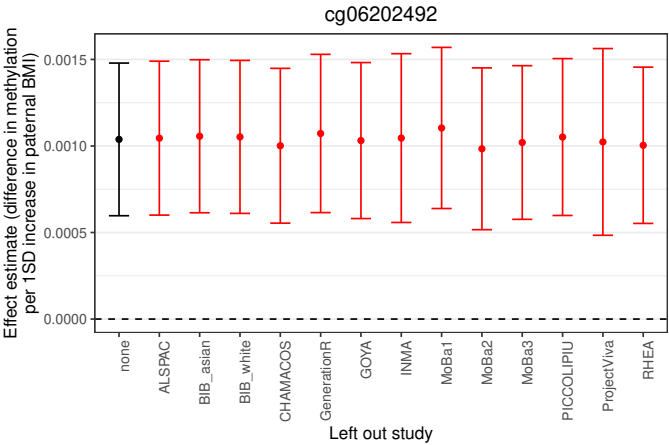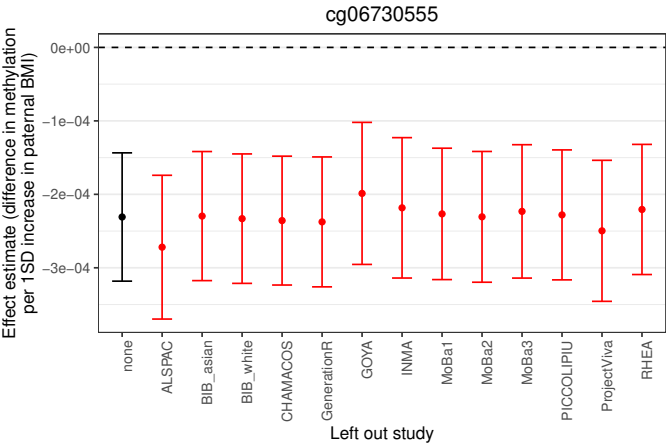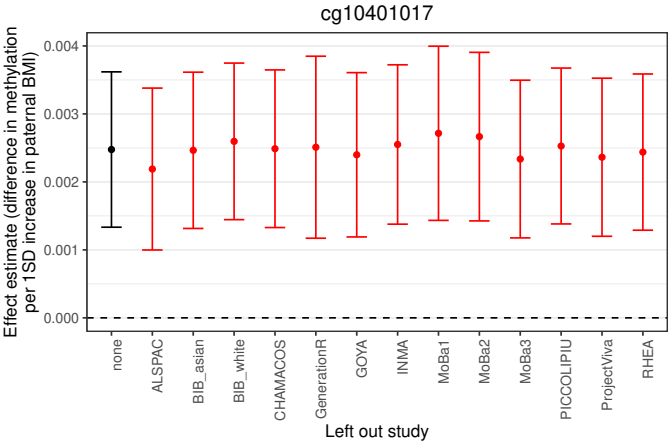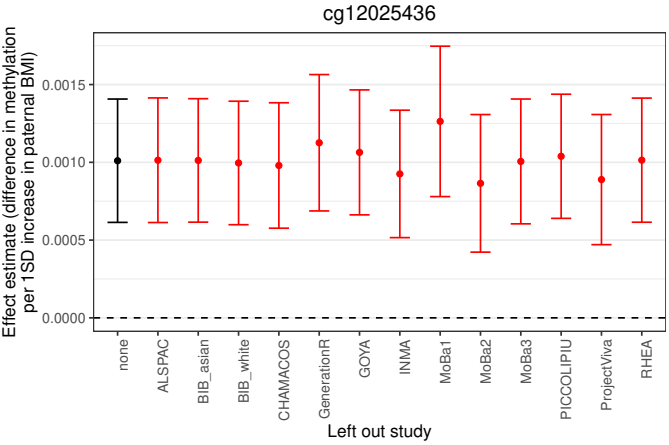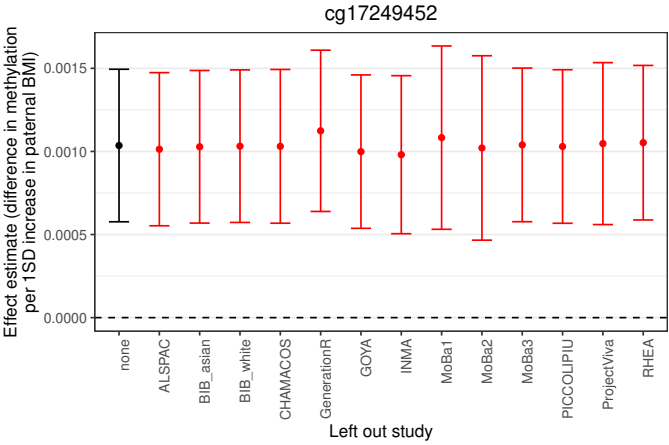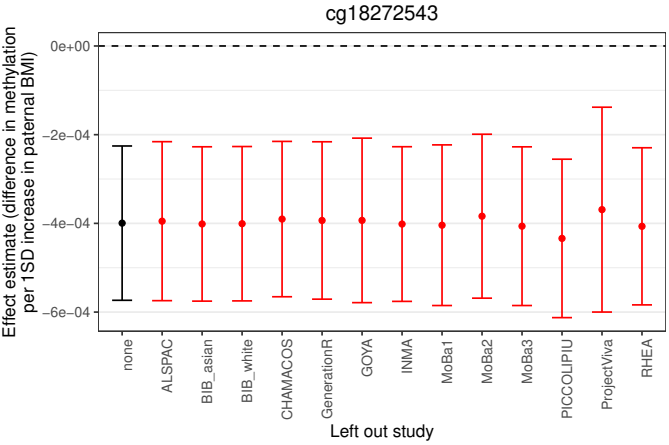

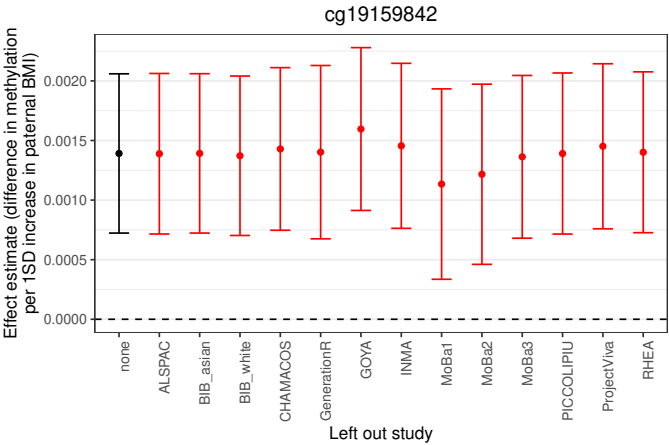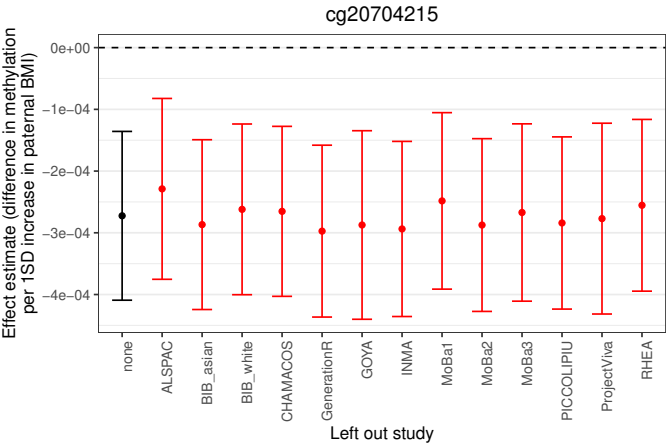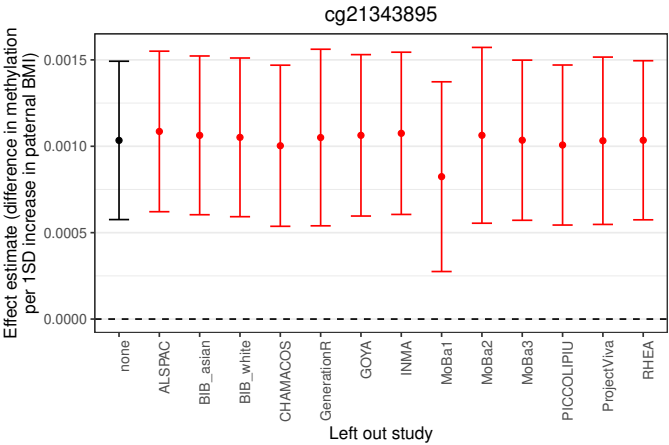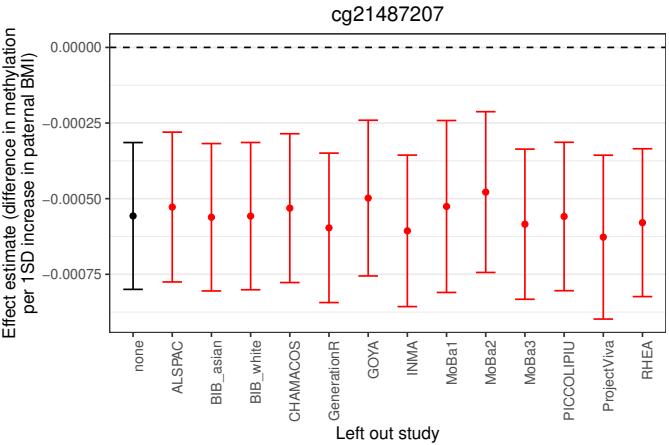

Paternal BMI (adjusted for maternal BMI): pages 6-7

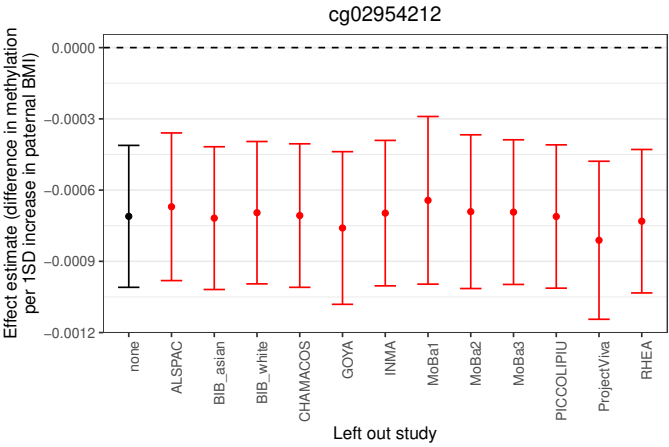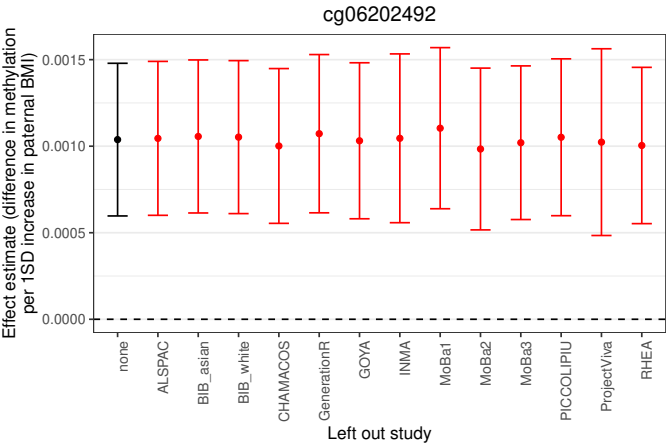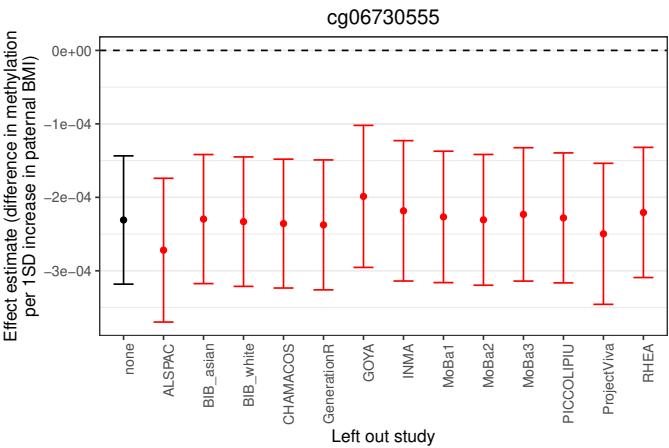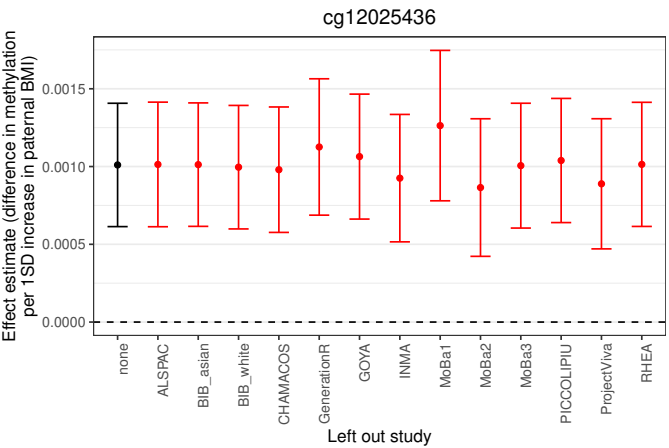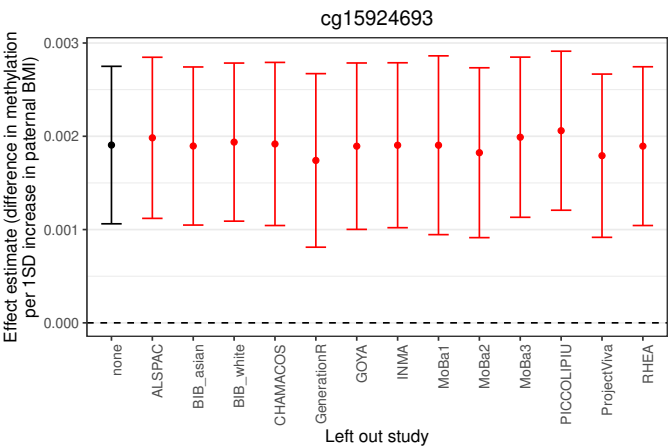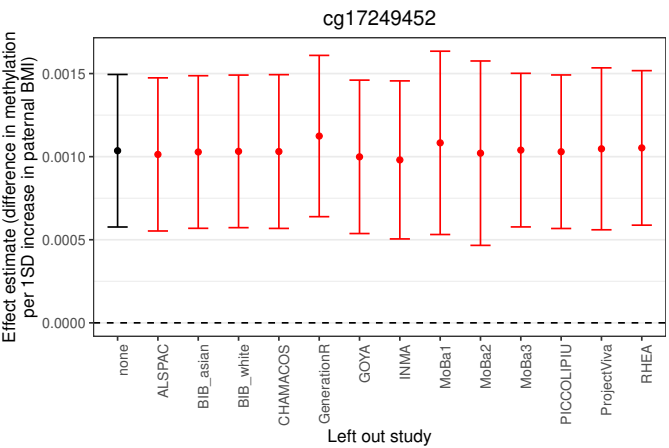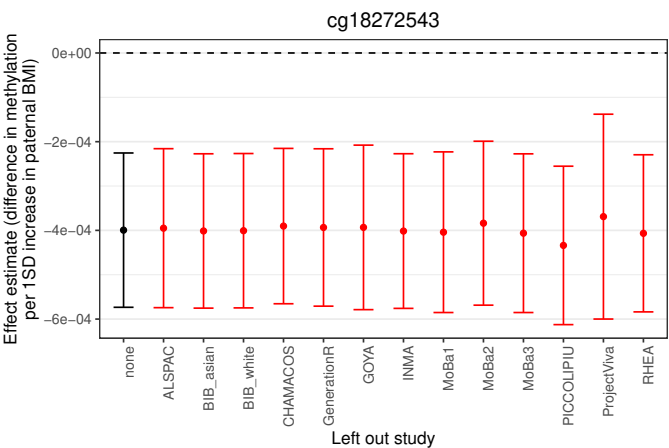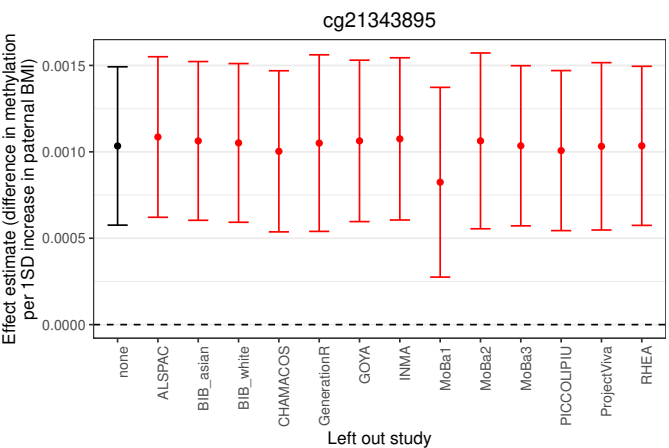

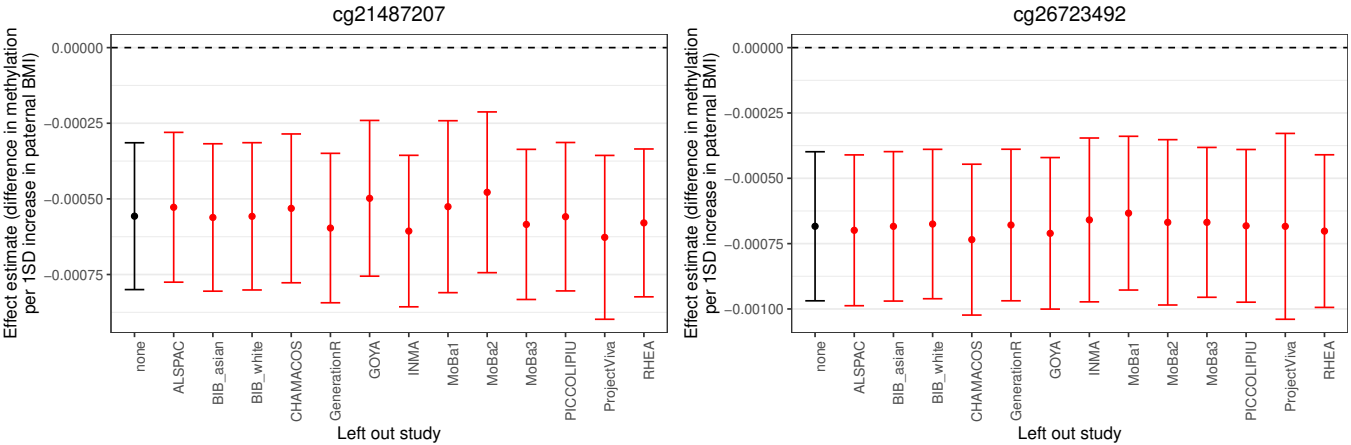

Paternal BMI adjusted for maternal BMI – female offspring  
only: pages 9-10



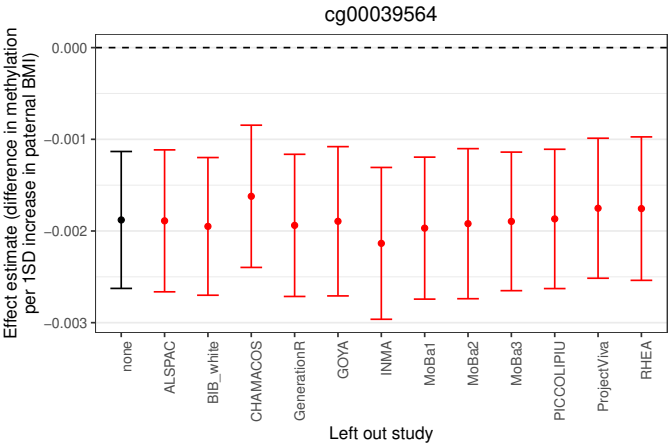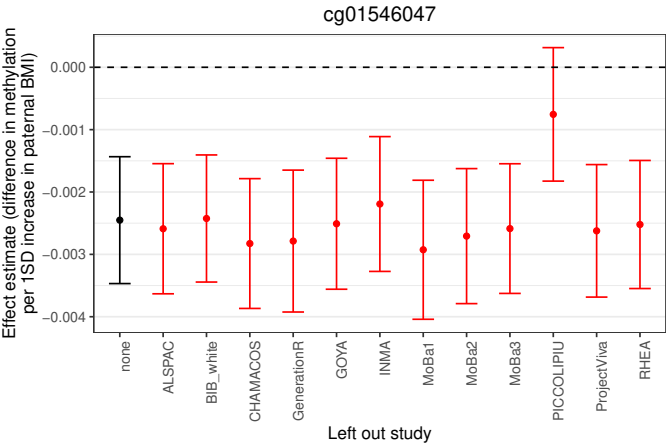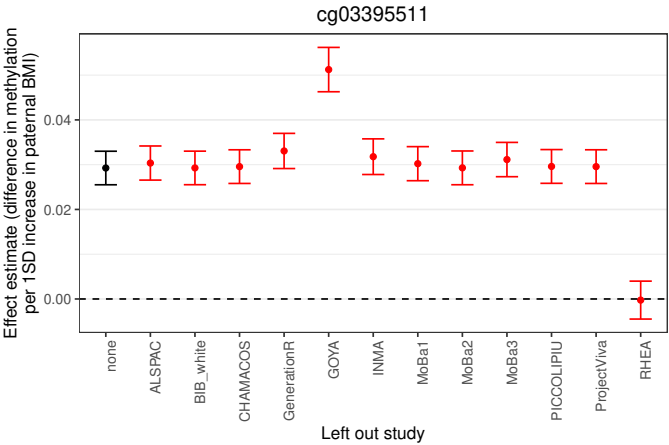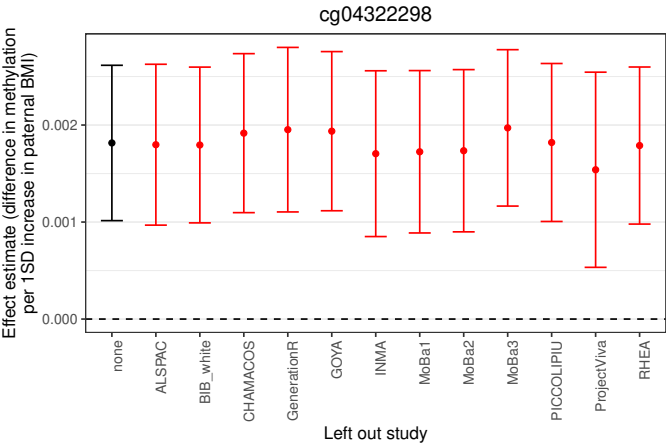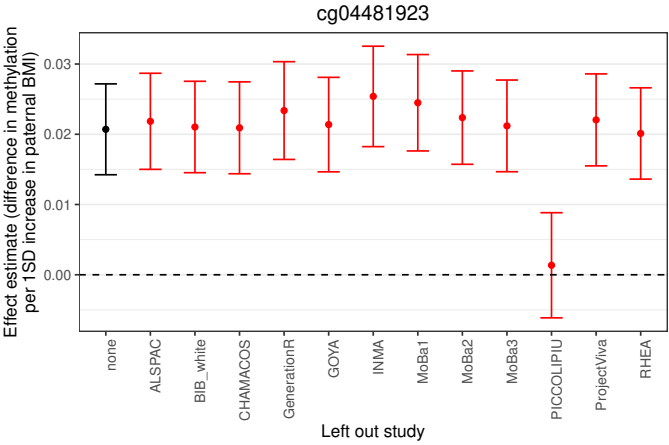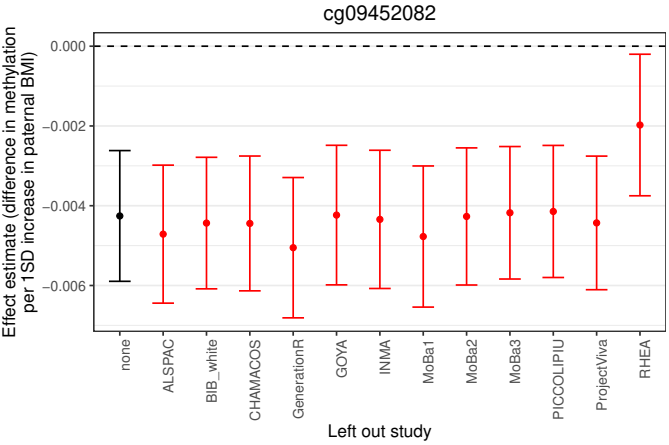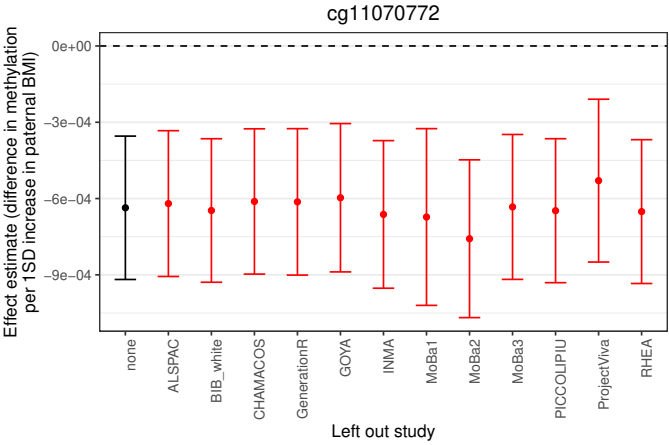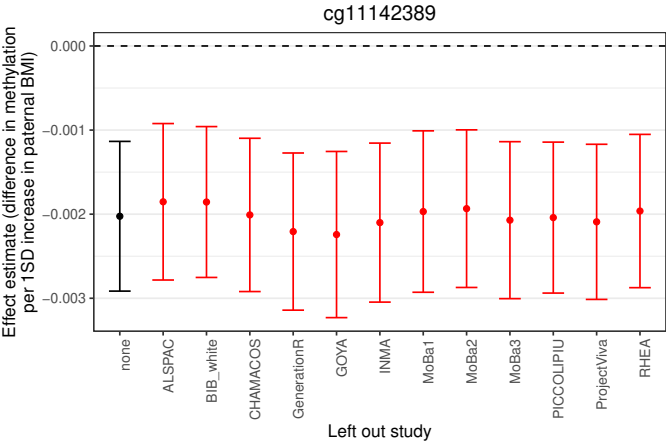

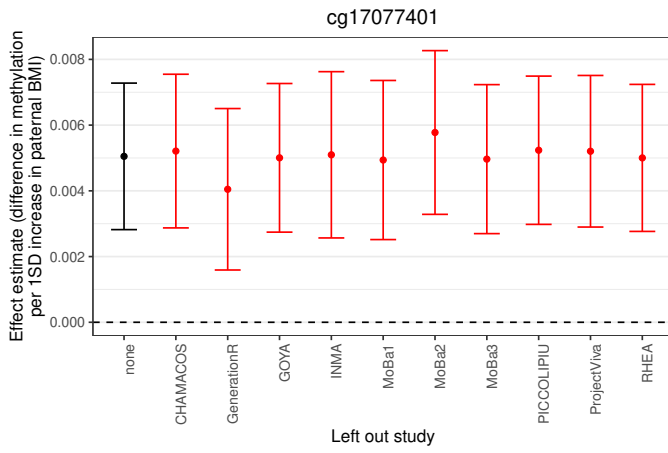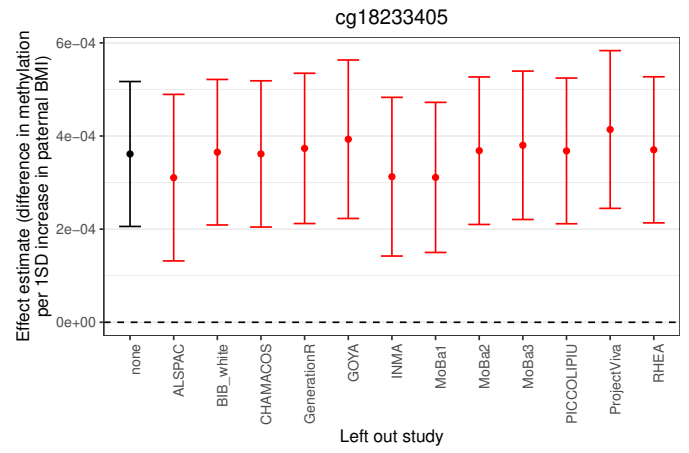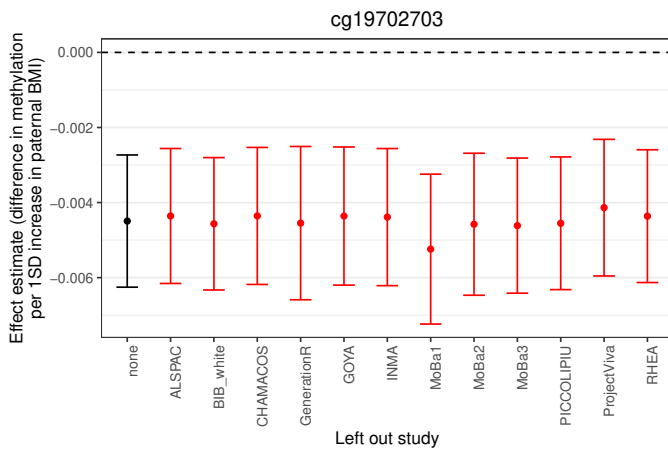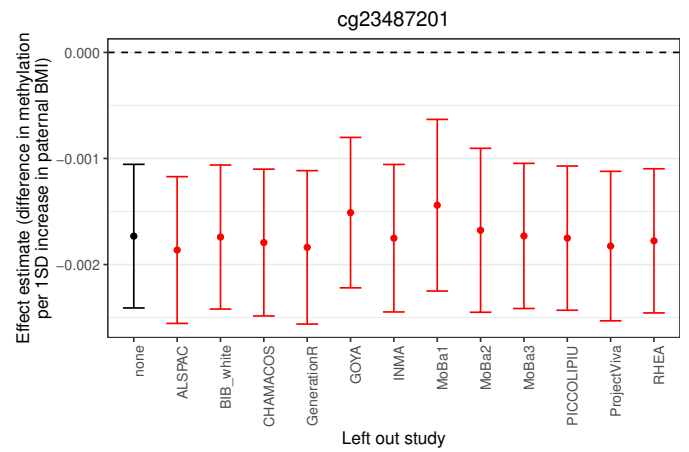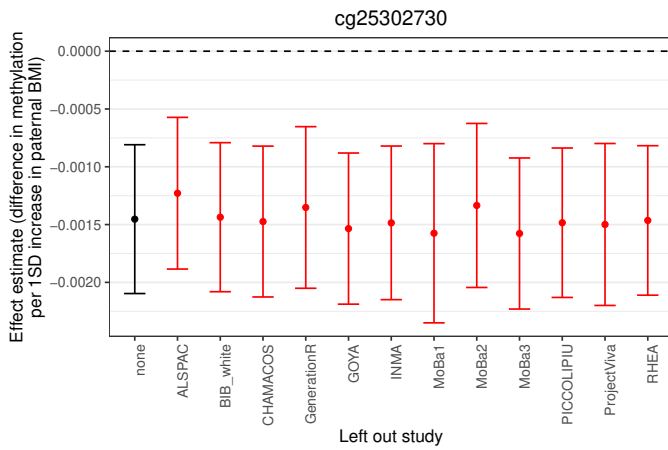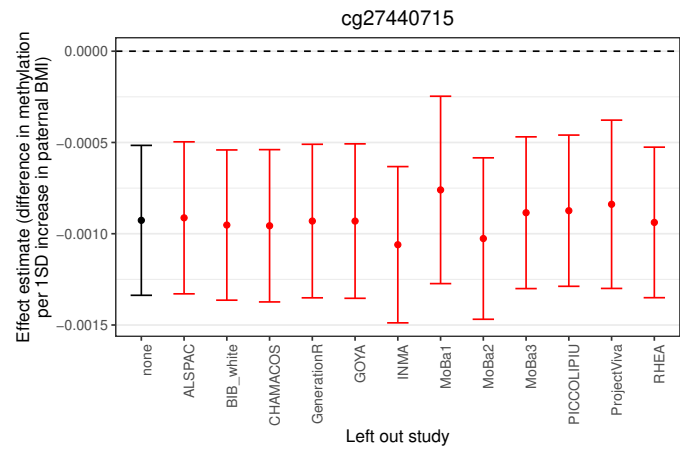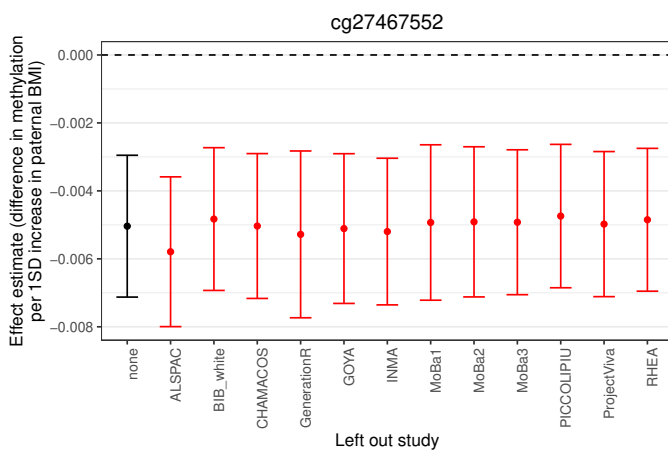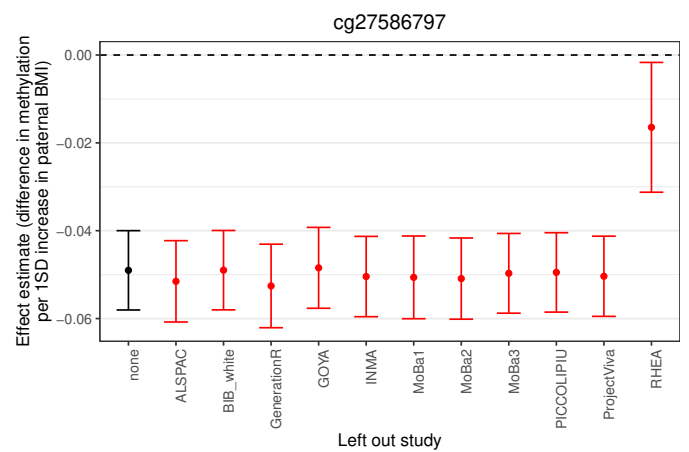

Paternal BMI adjusted for maternal BMI – male offspring  
only: page 12

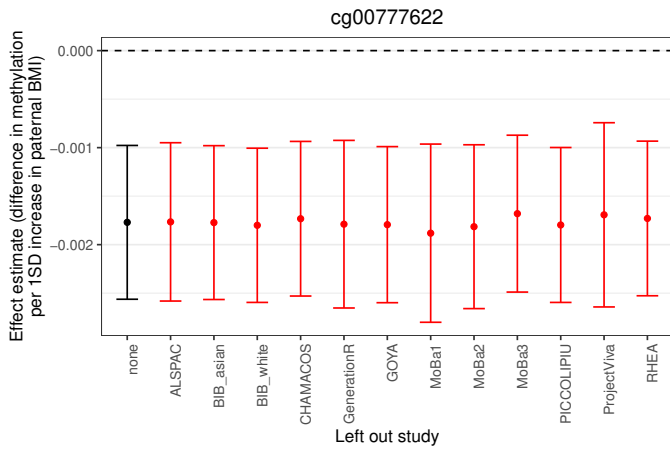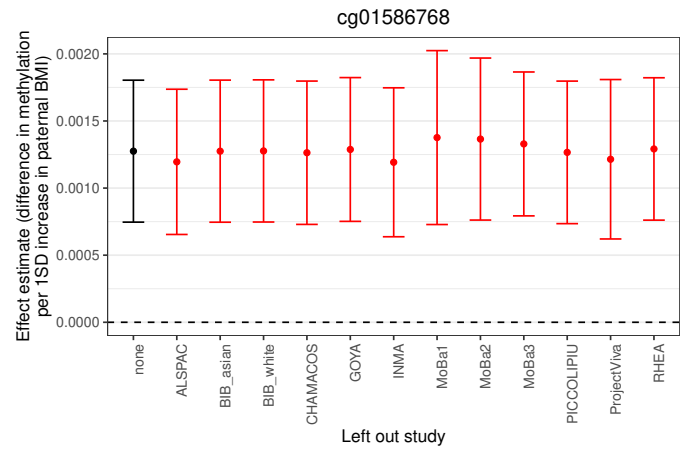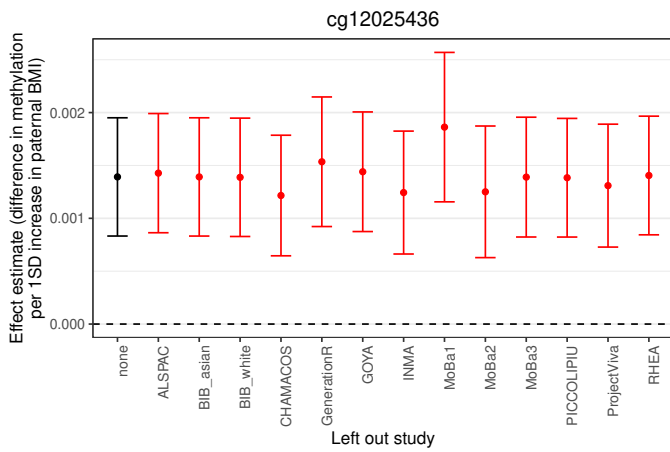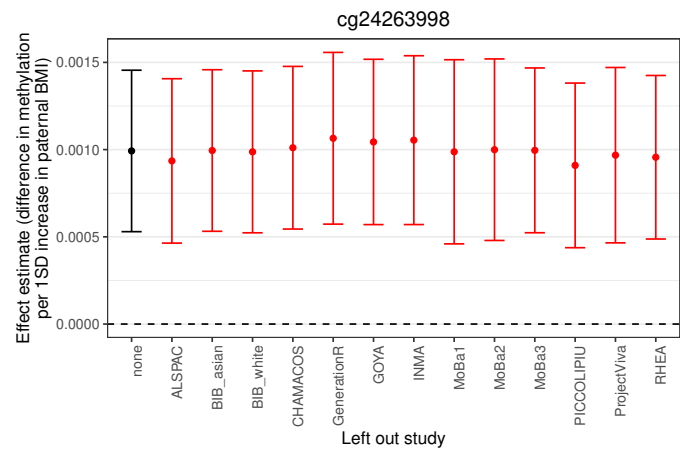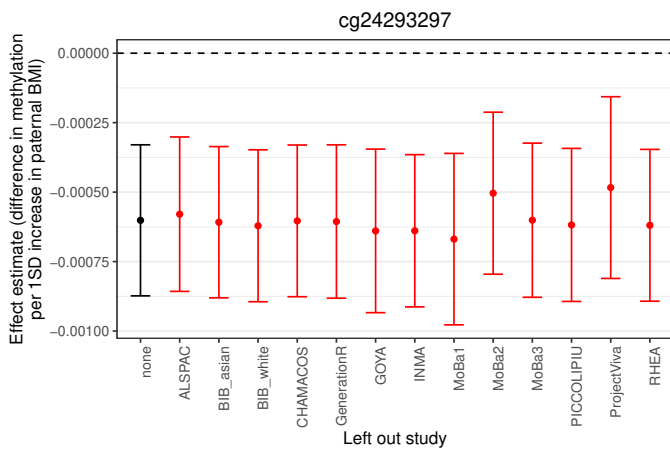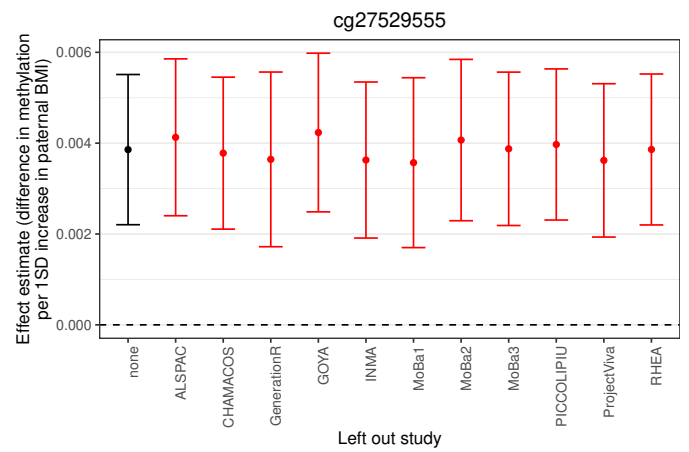

Maternal BMI (unadjusted for paternal BMI): pages 14-20

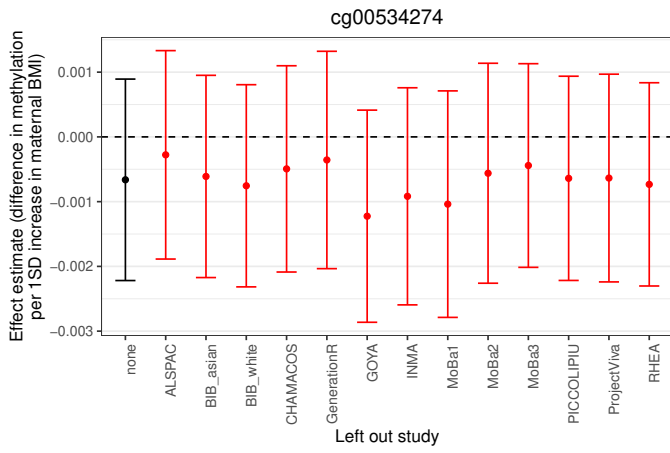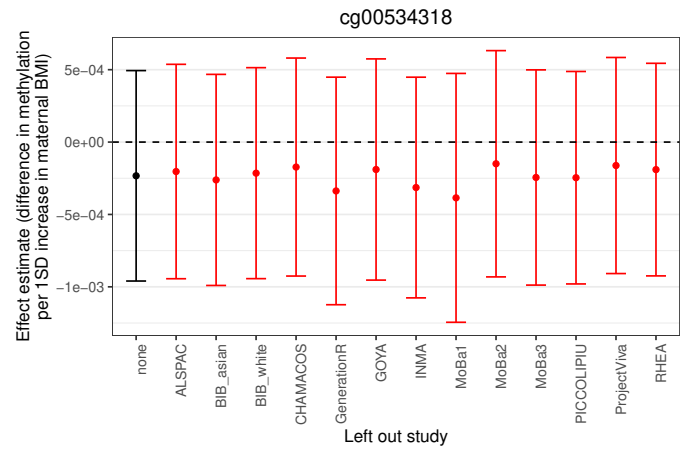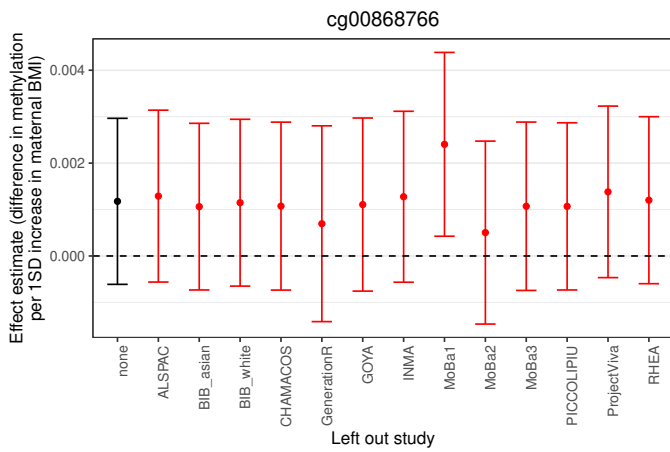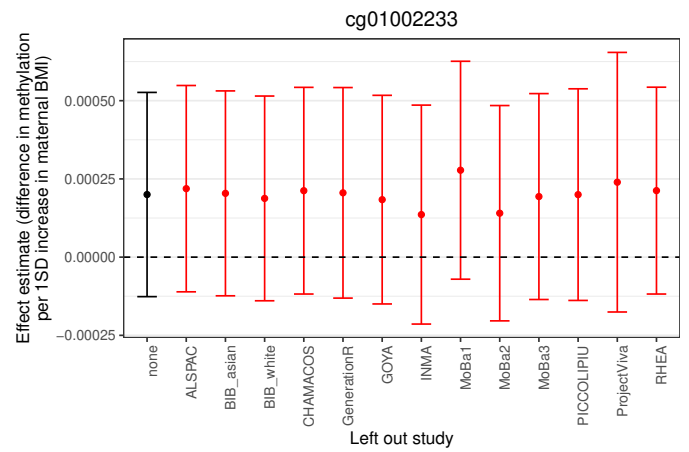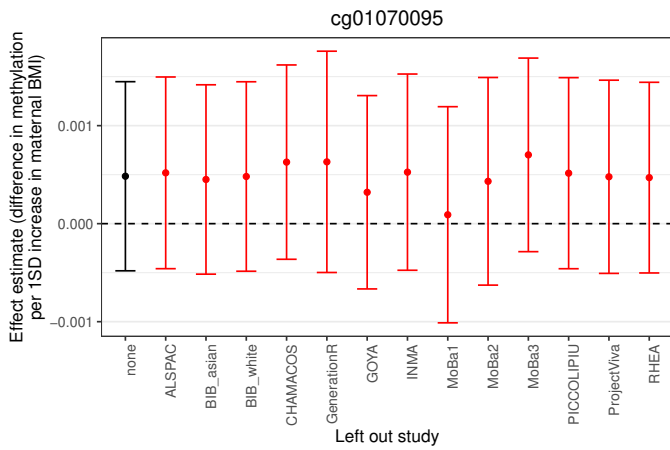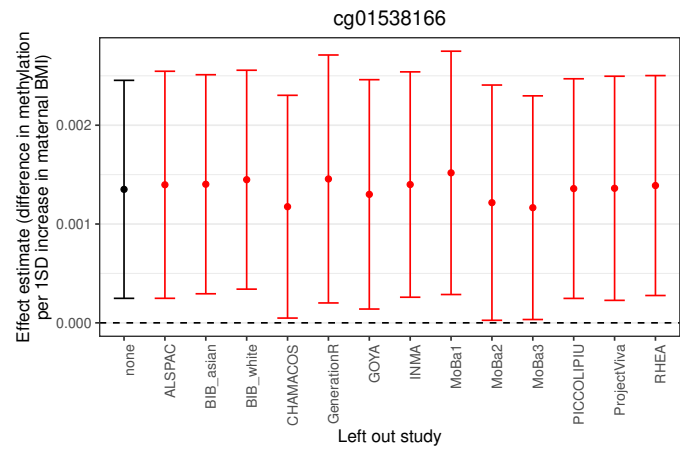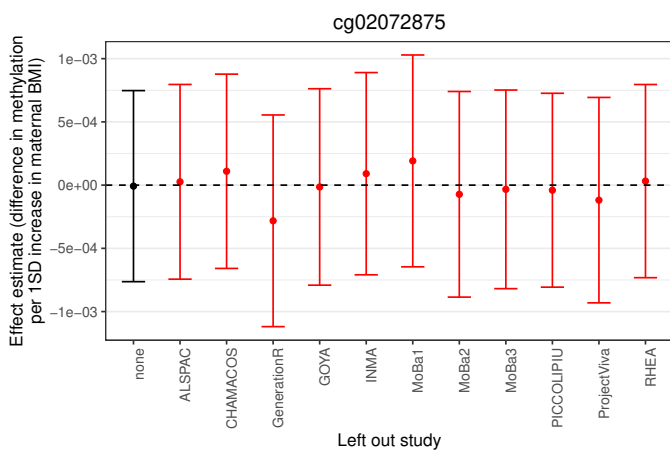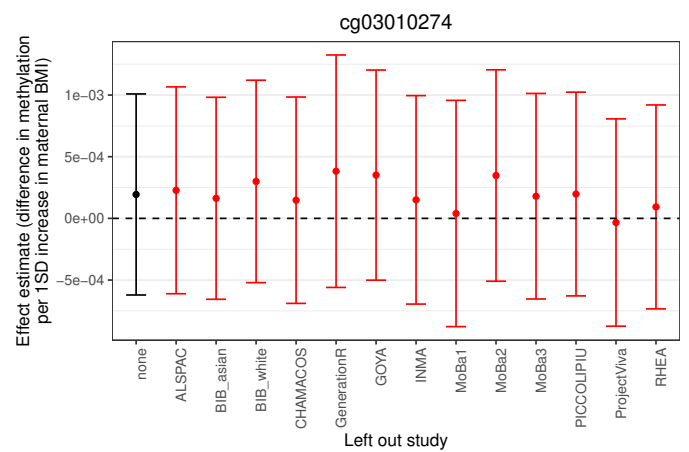

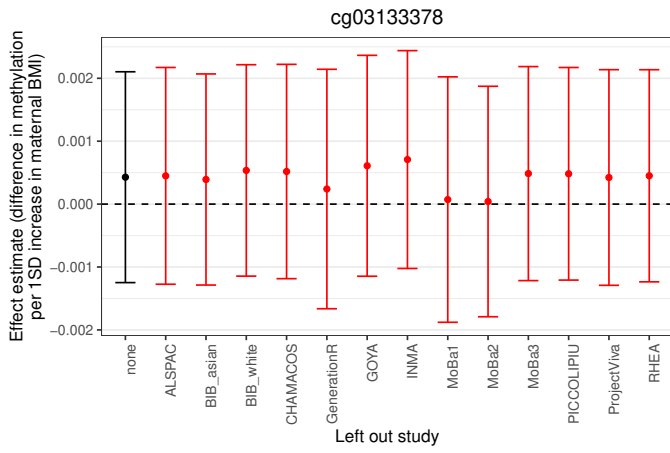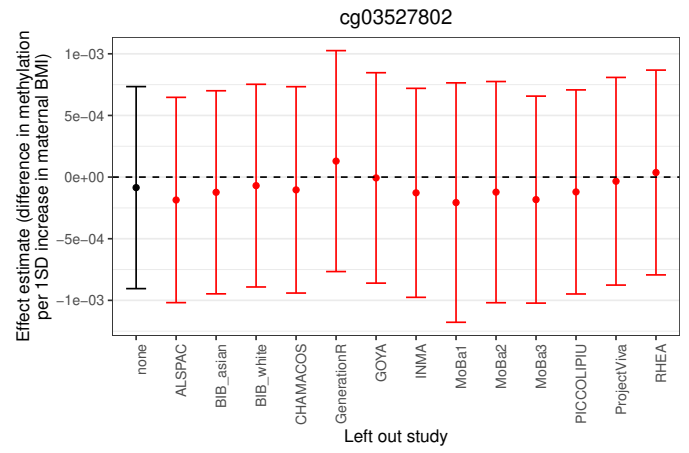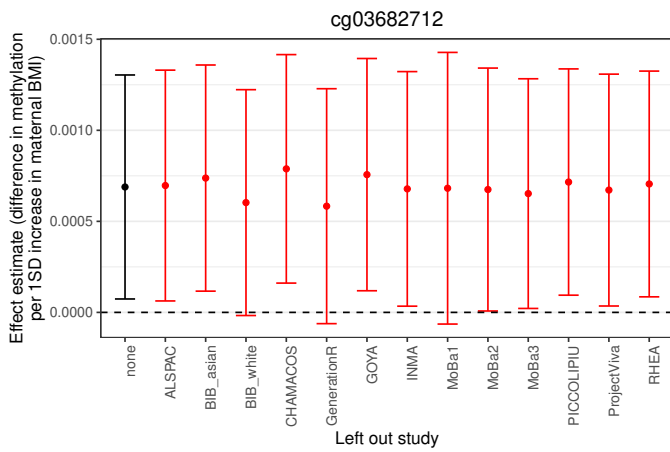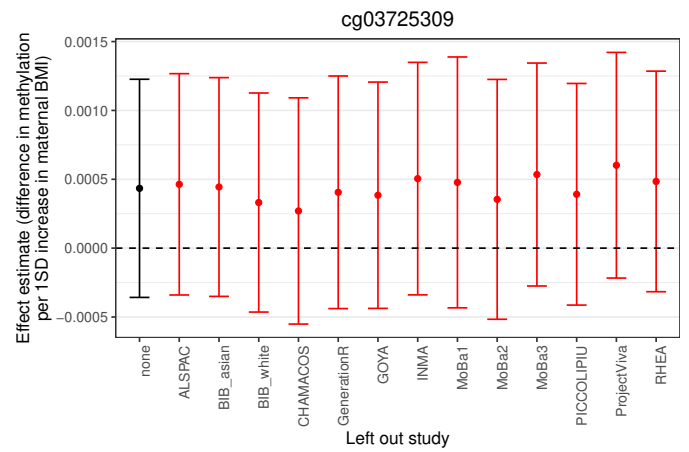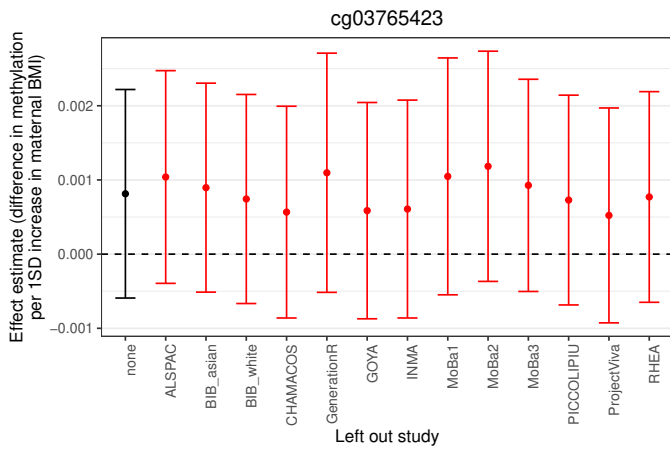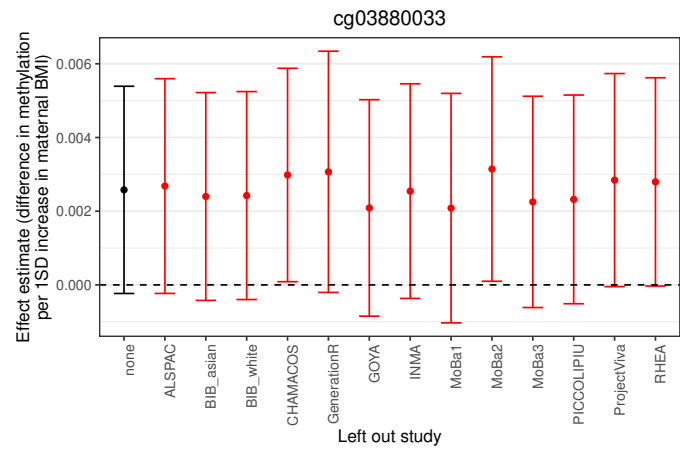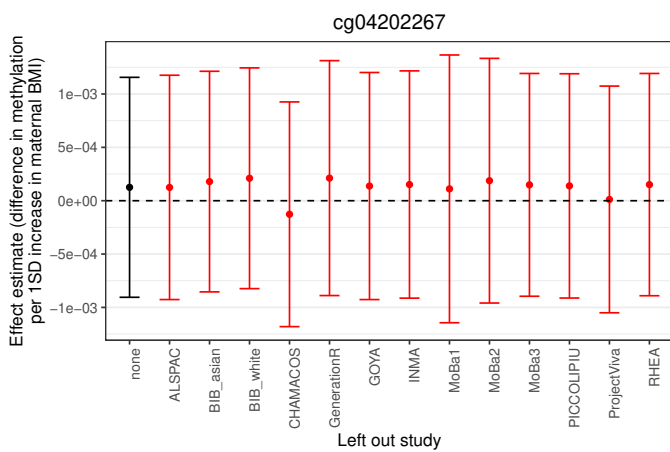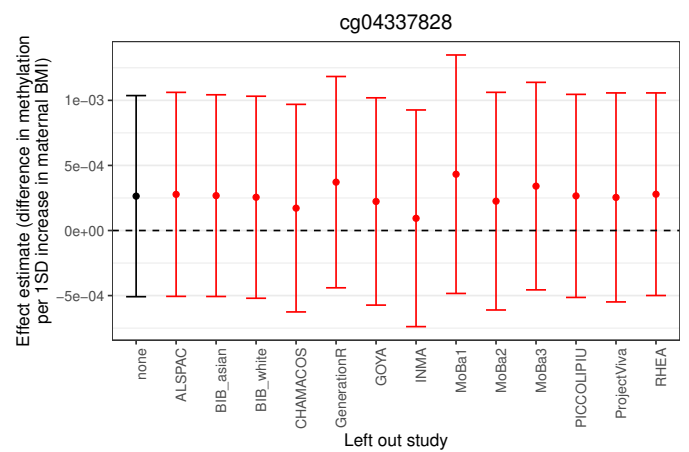

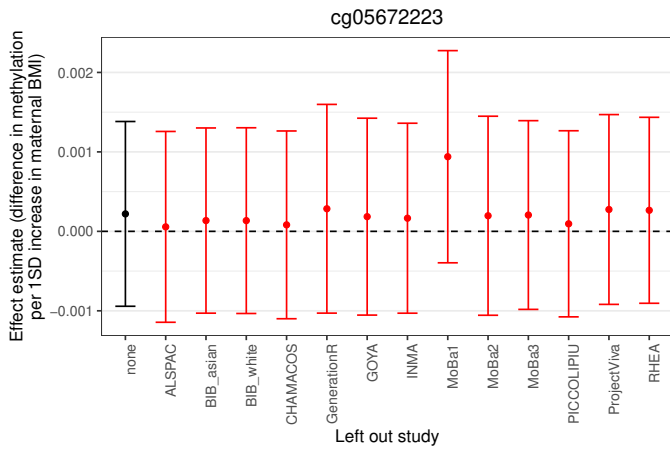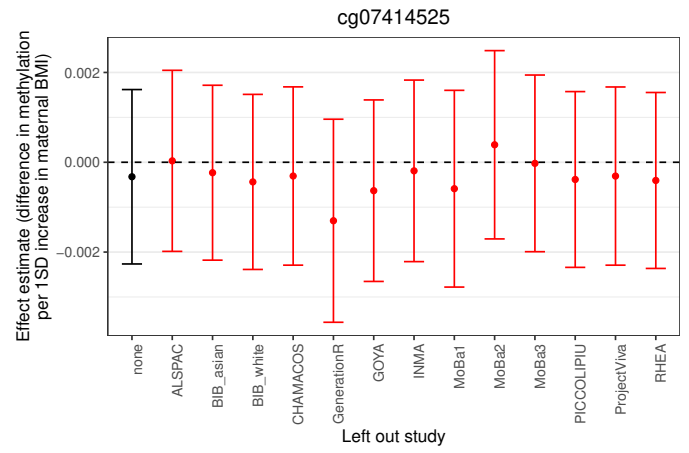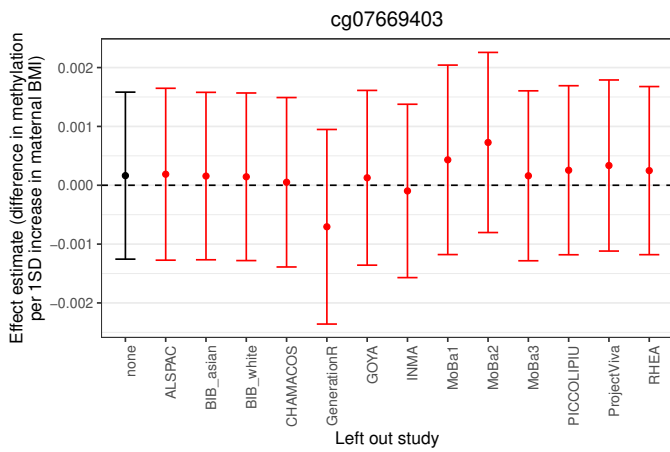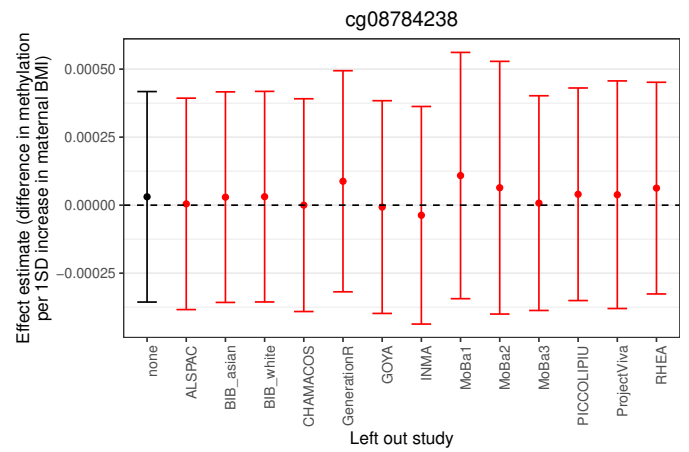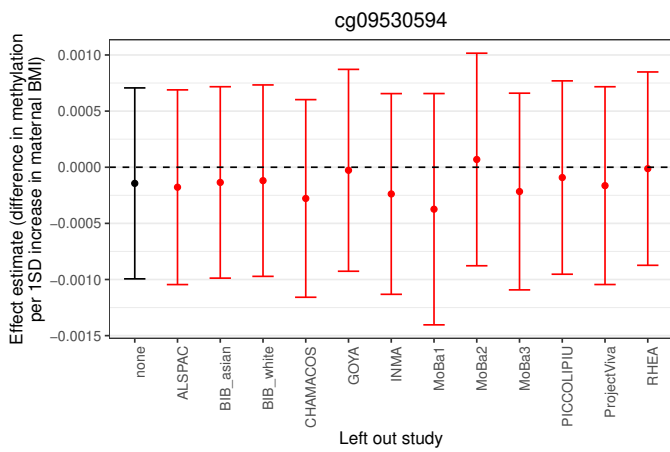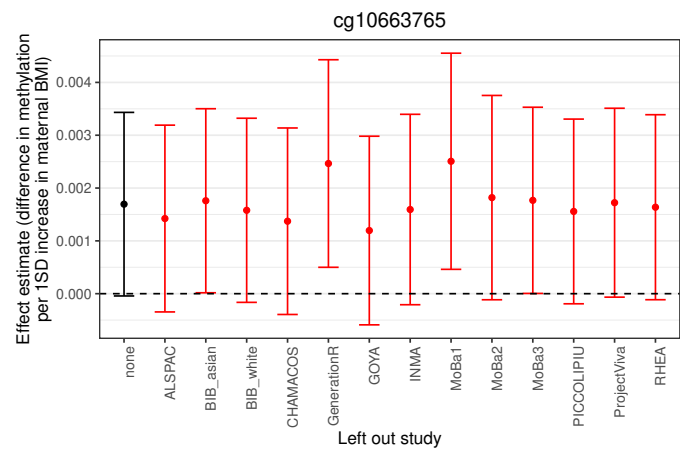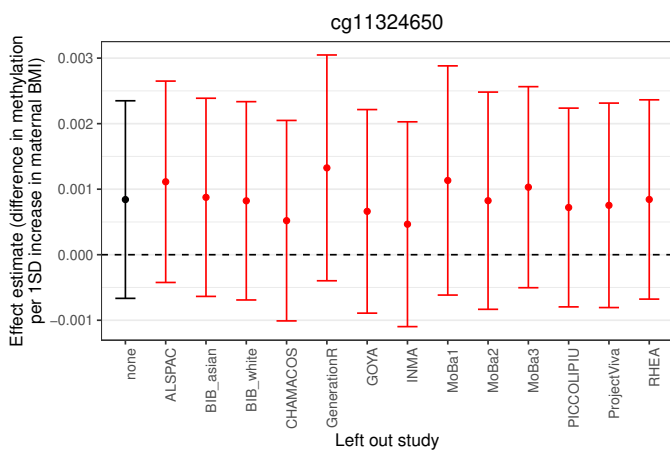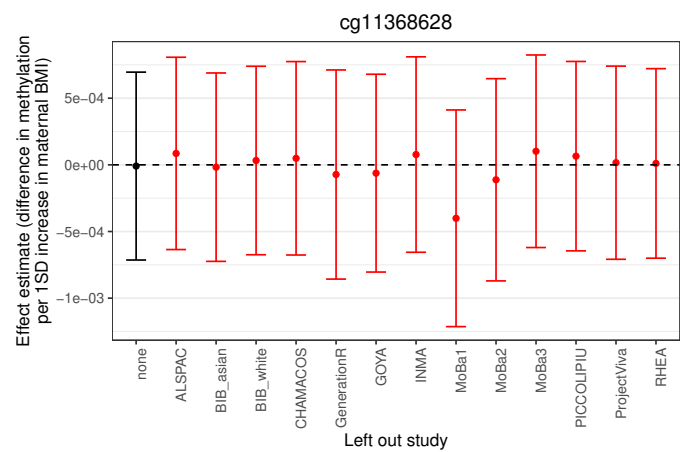



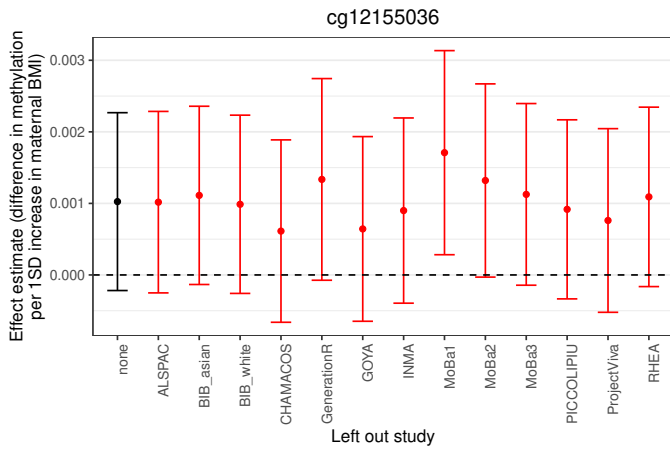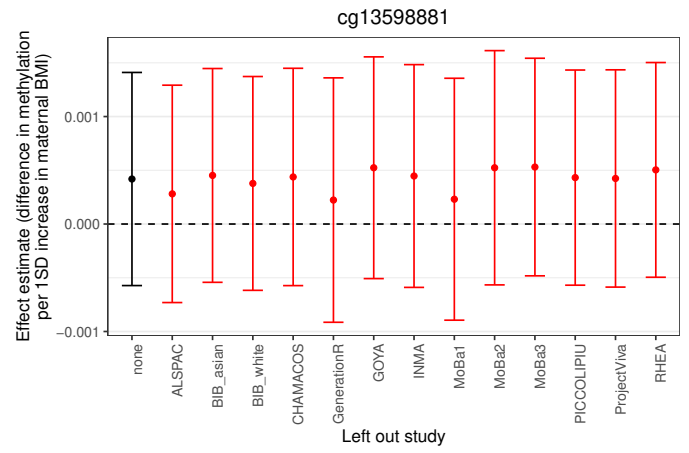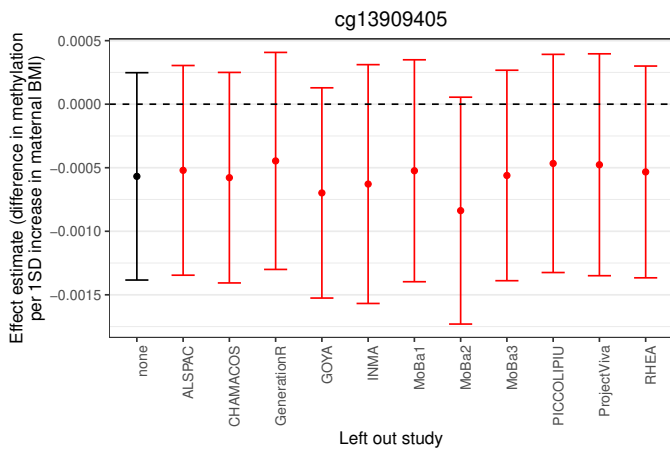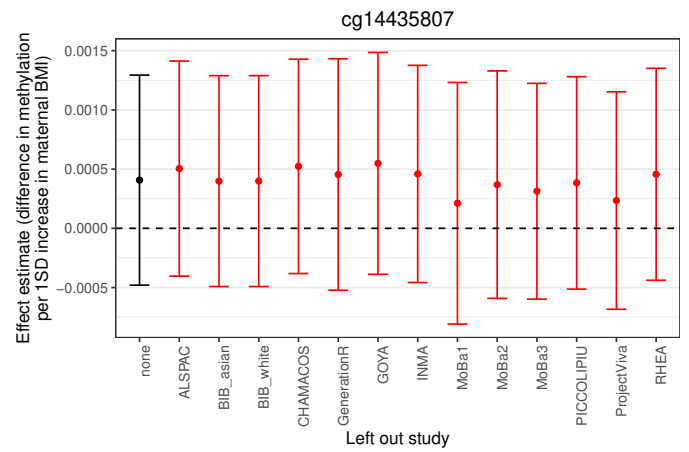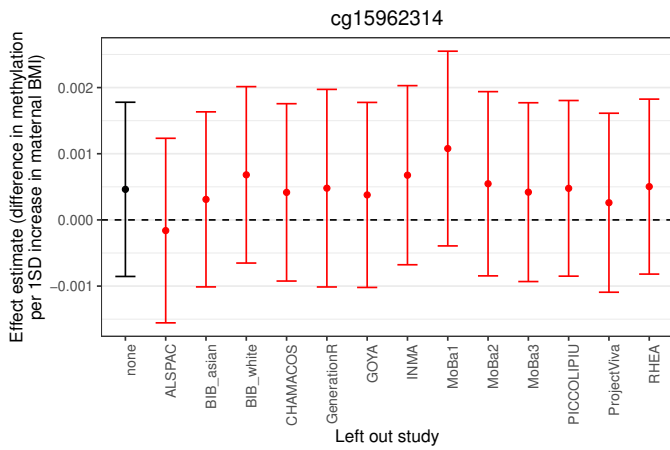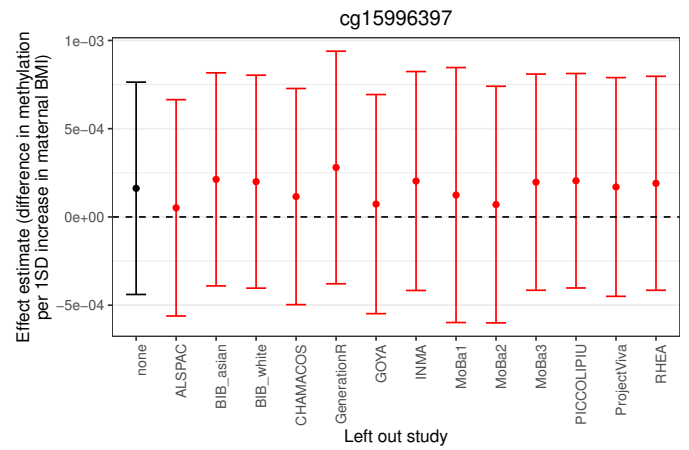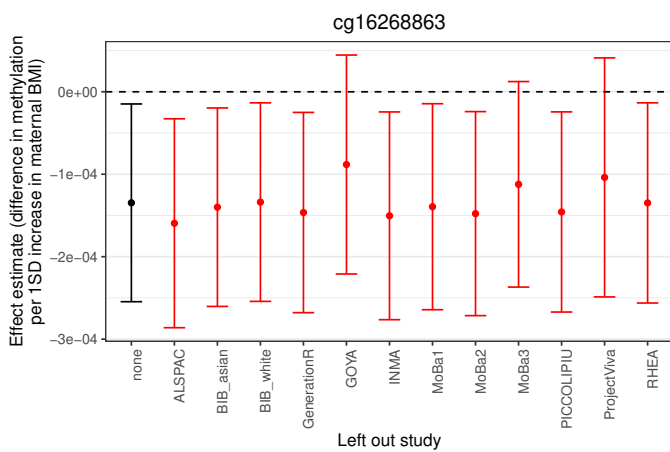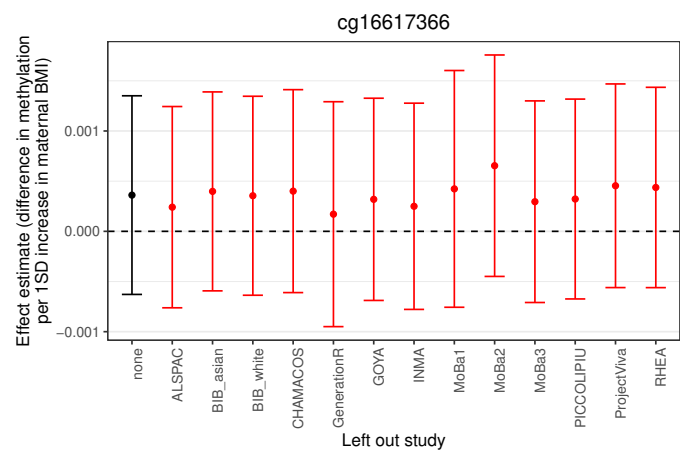

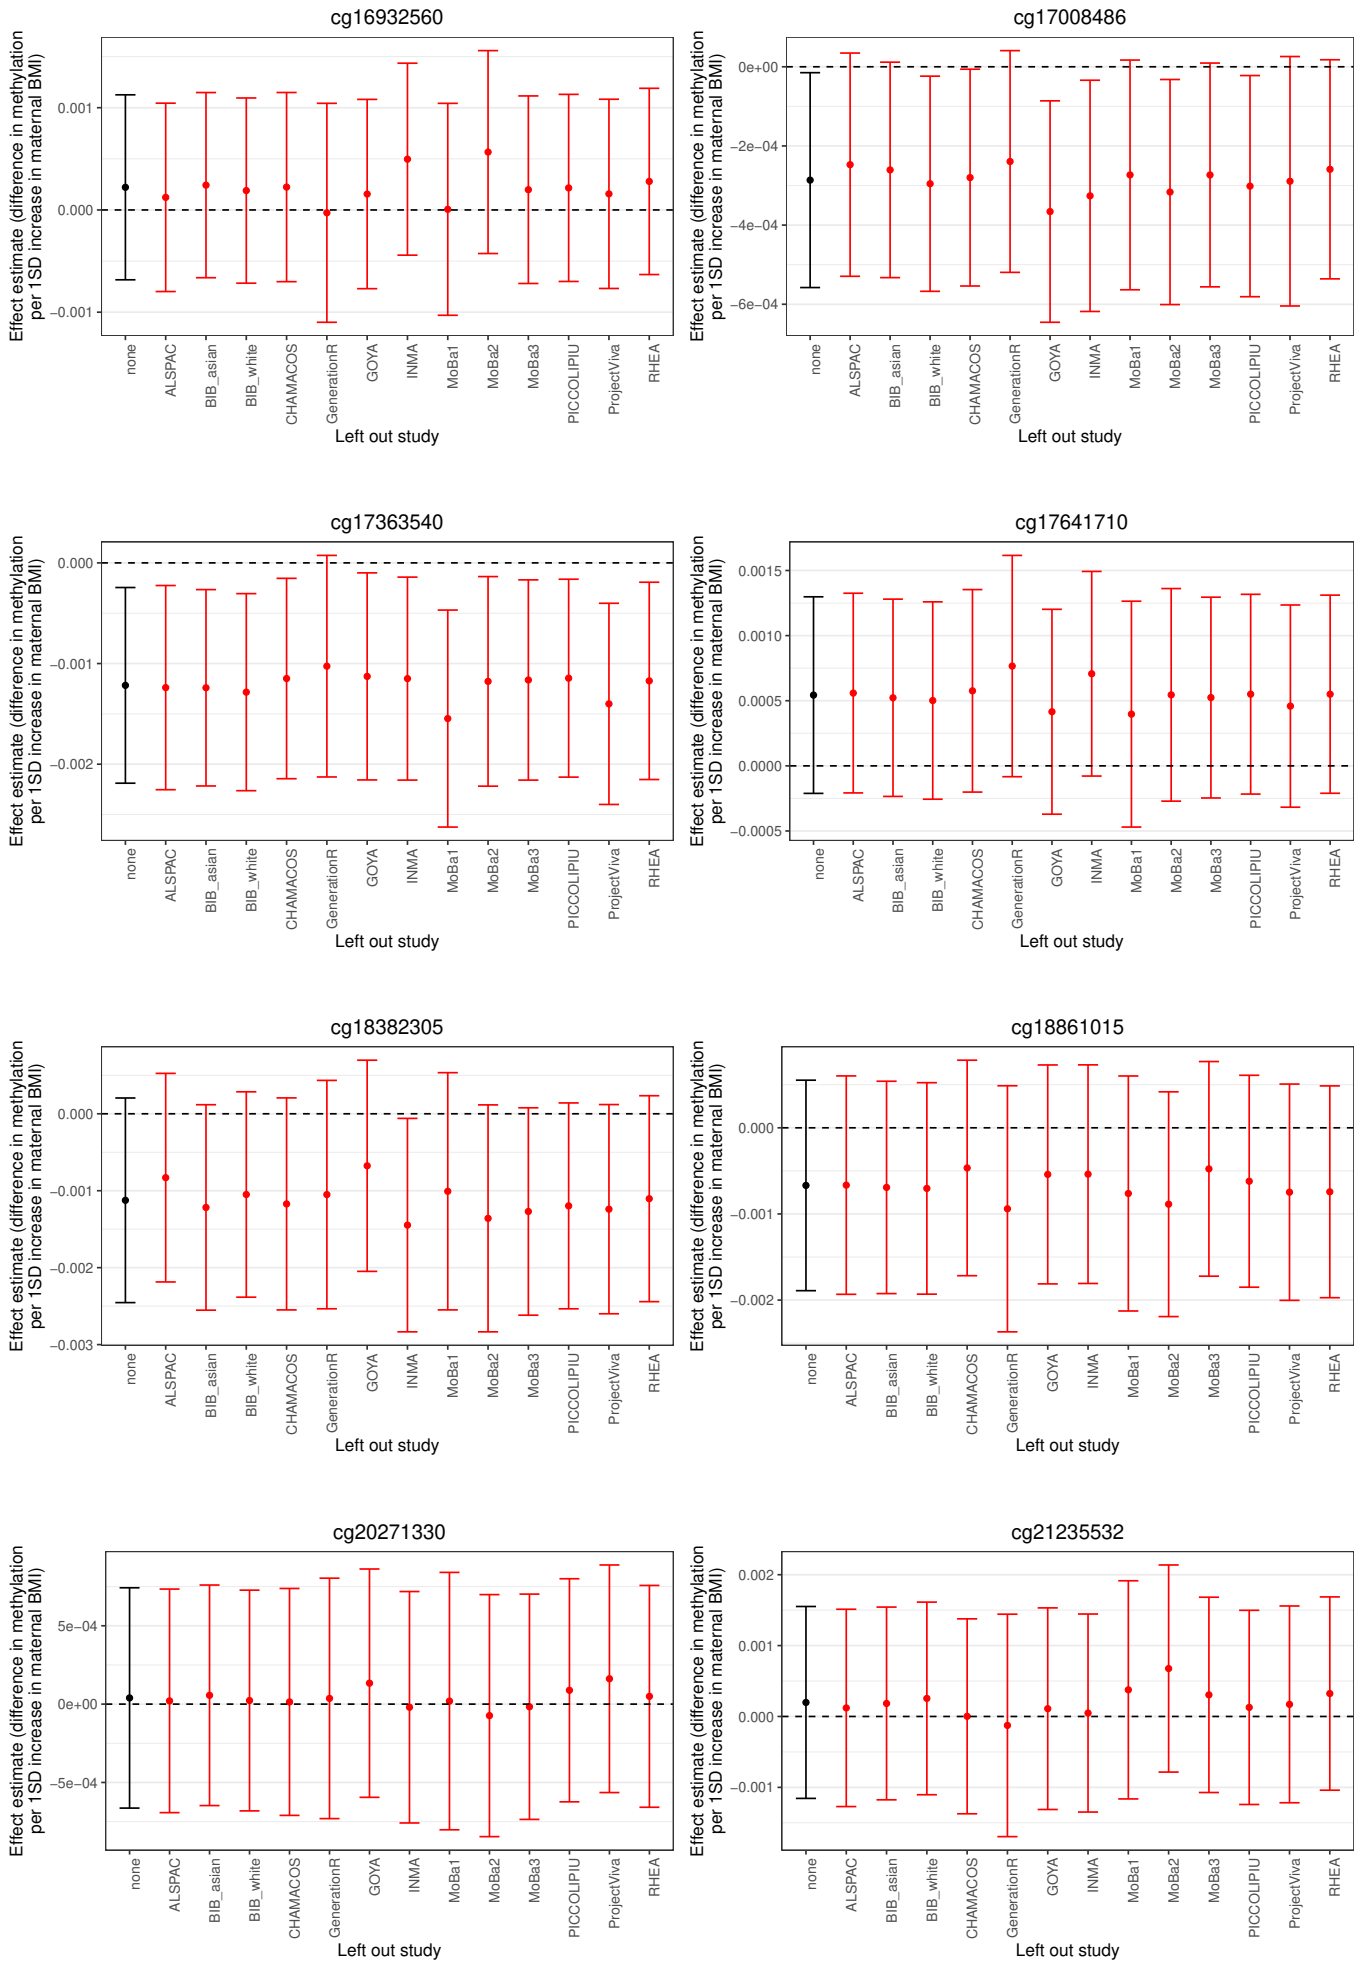

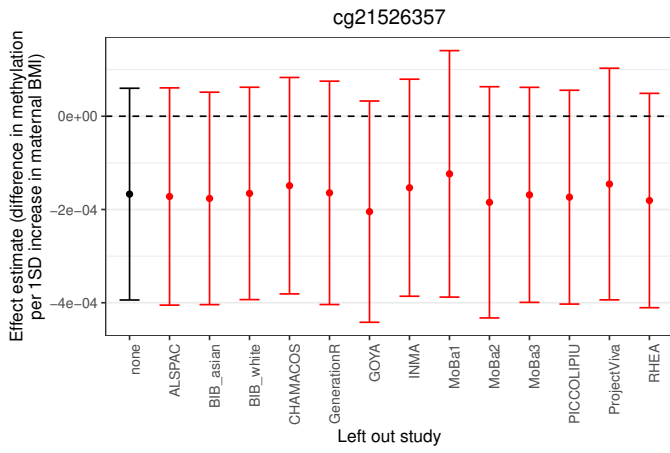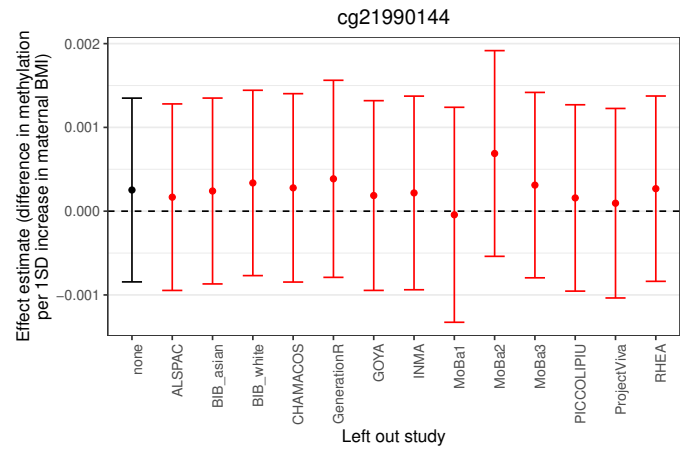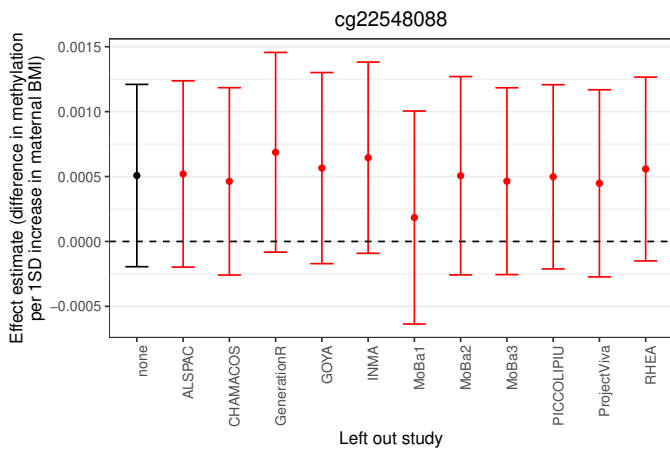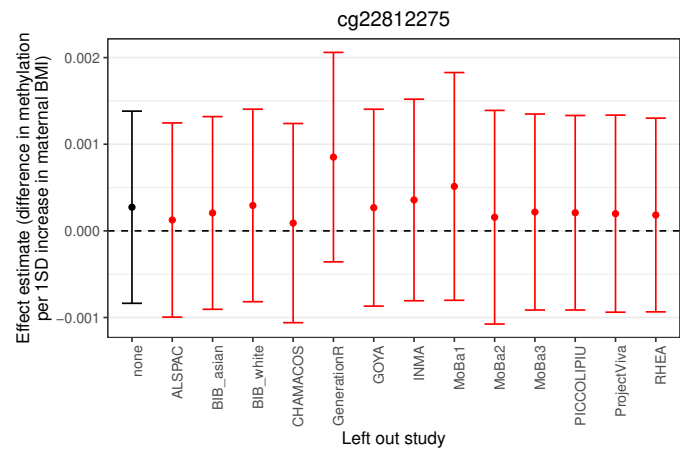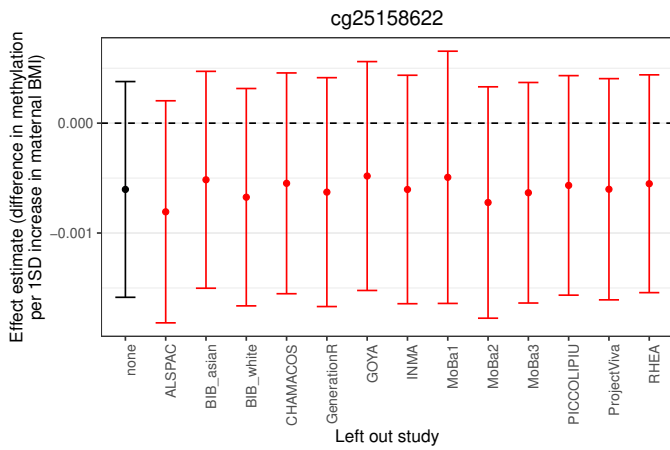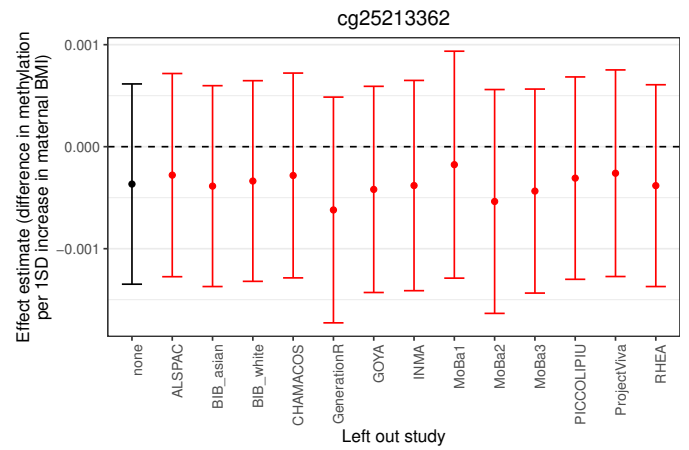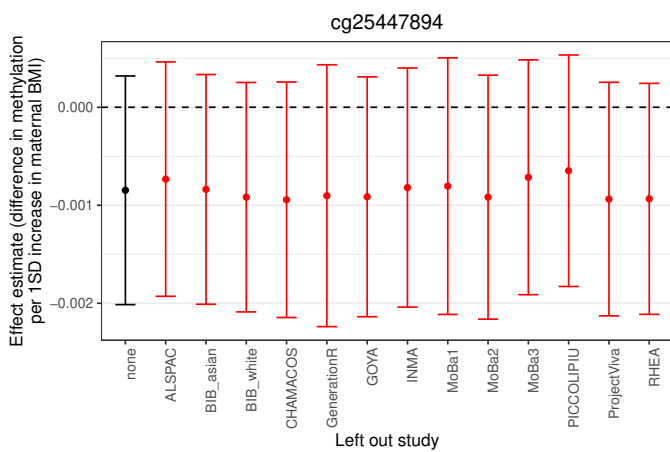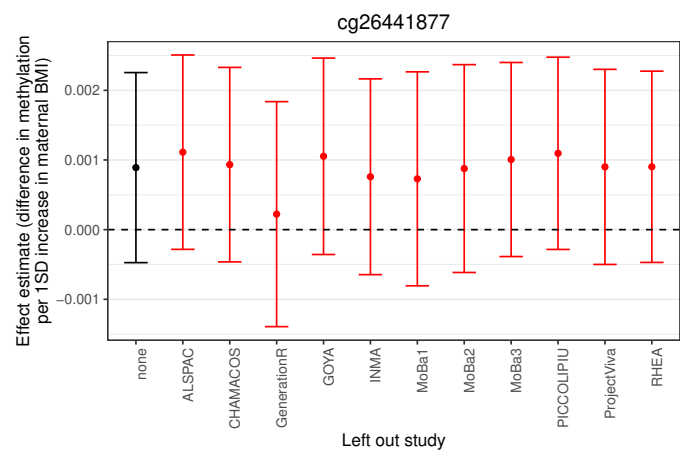

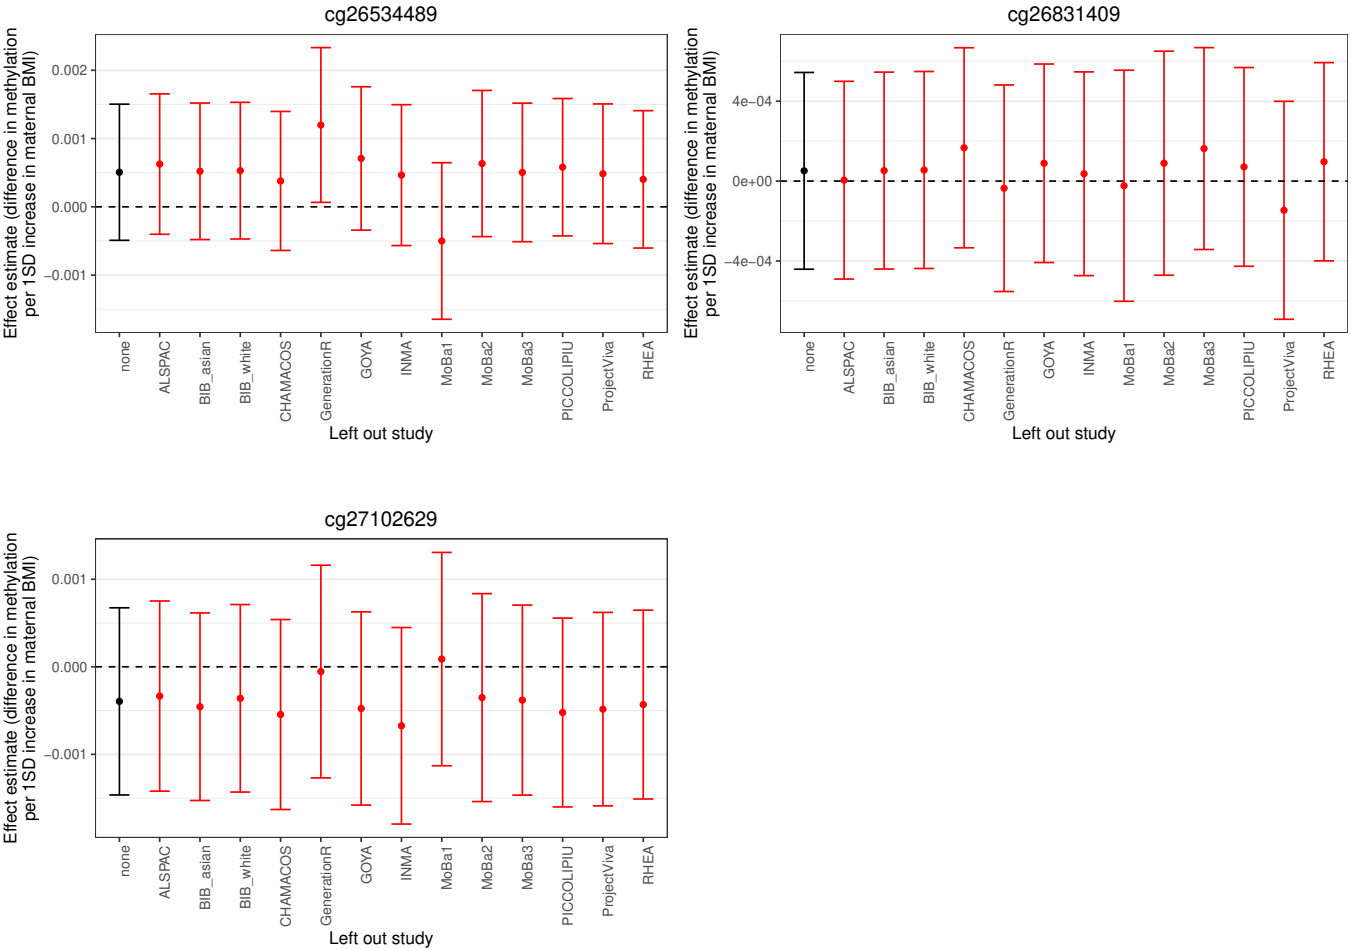

Maternal BMI (adjusted for paternal BMI): pages 22-27

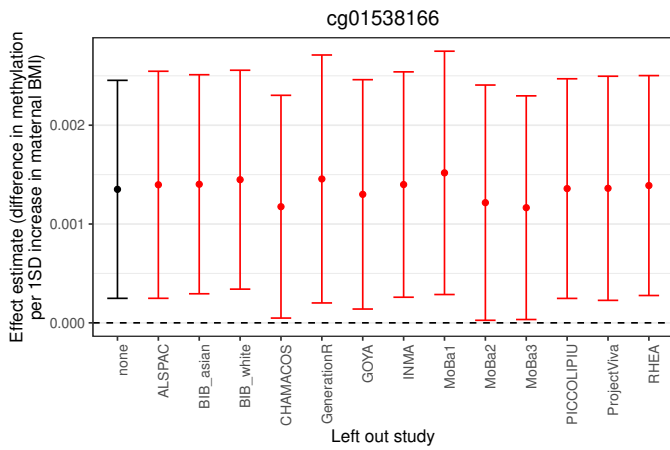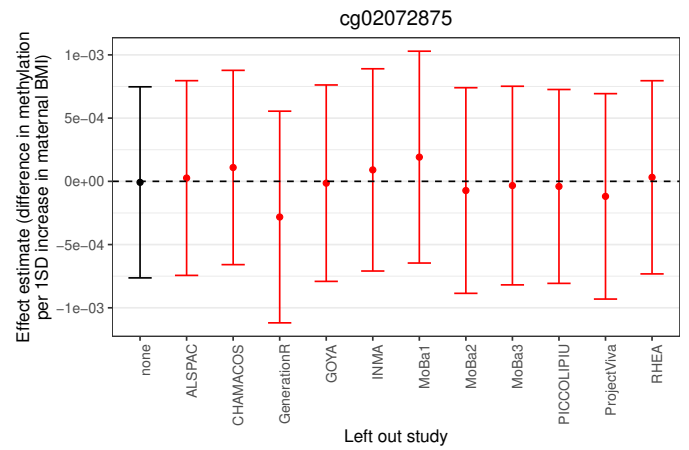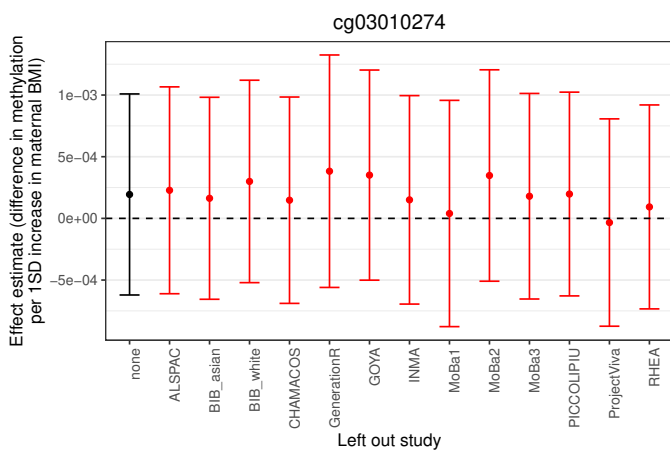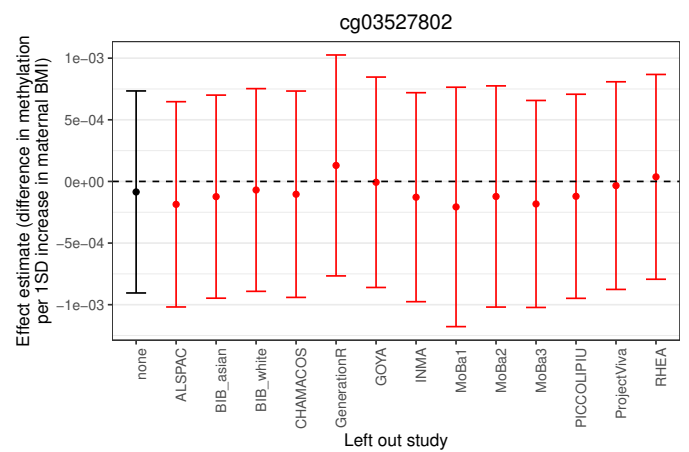

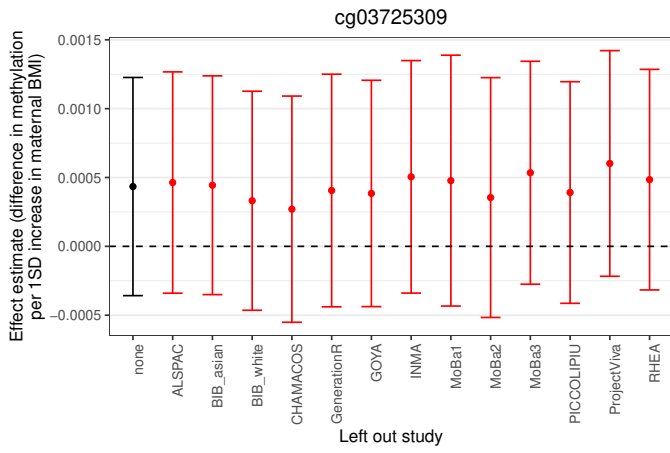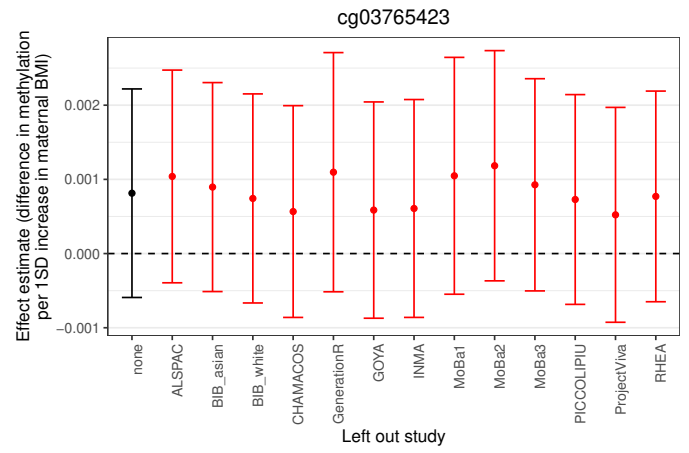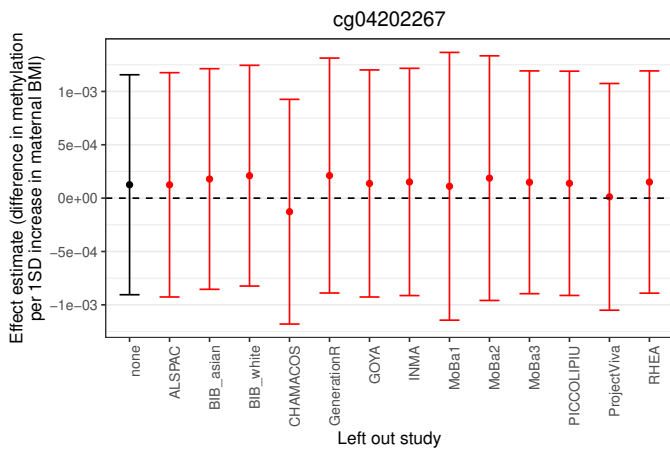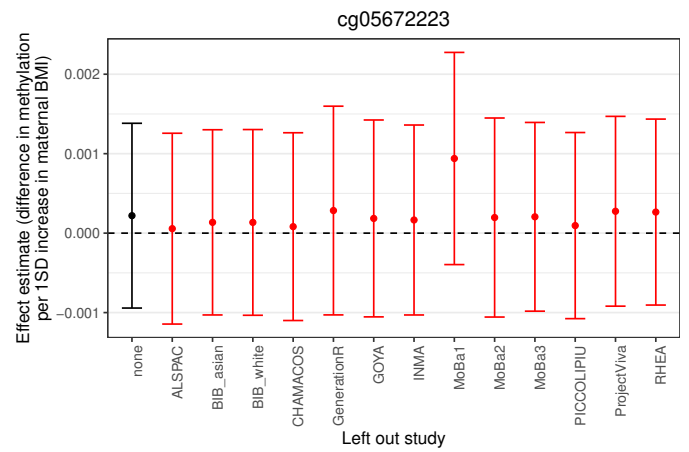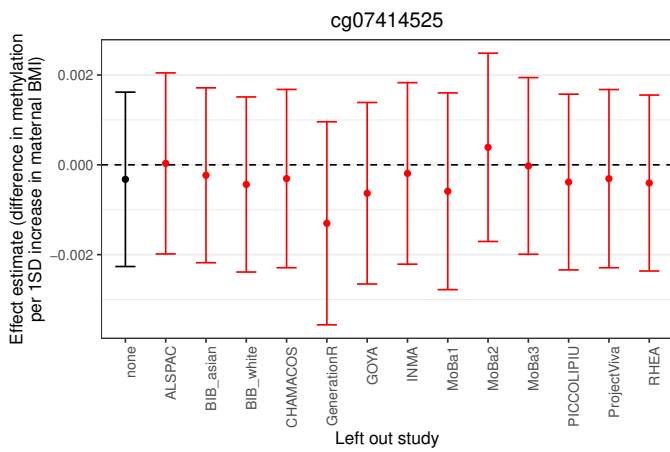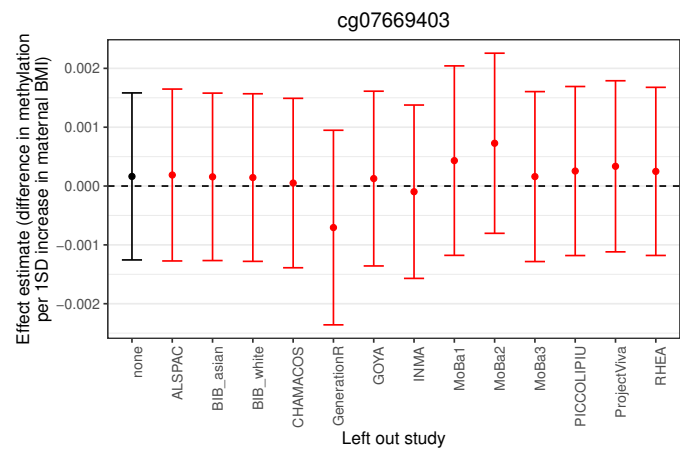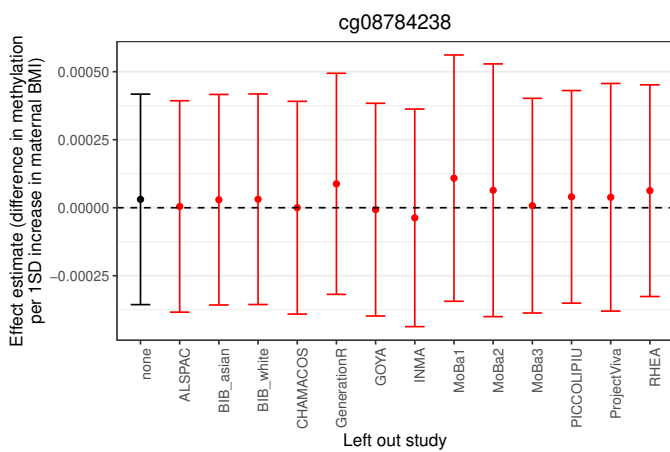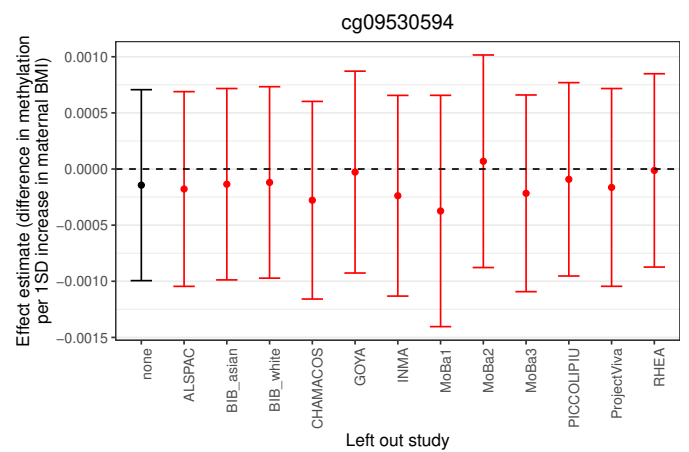

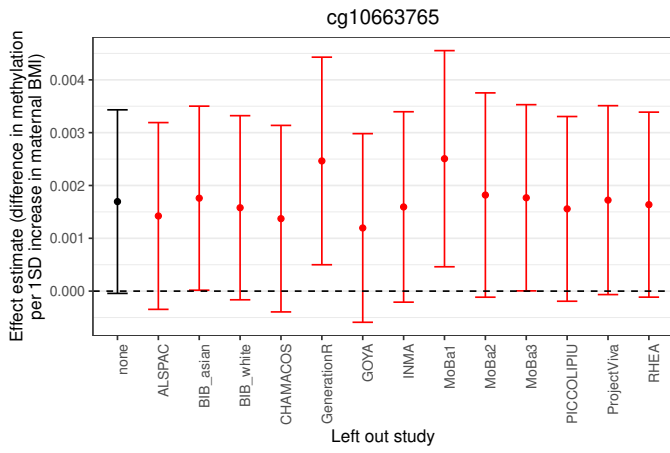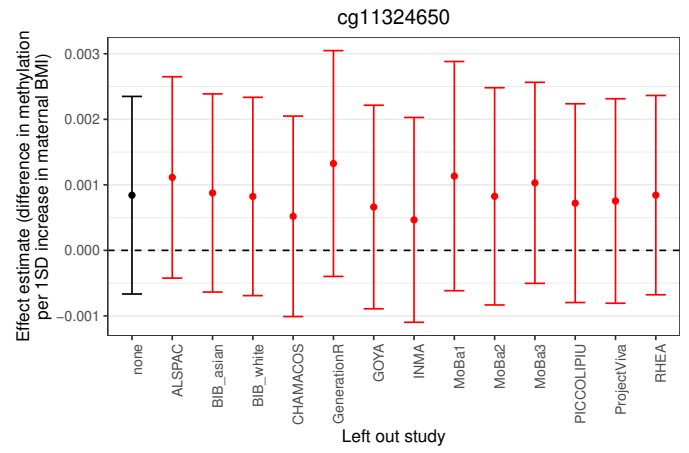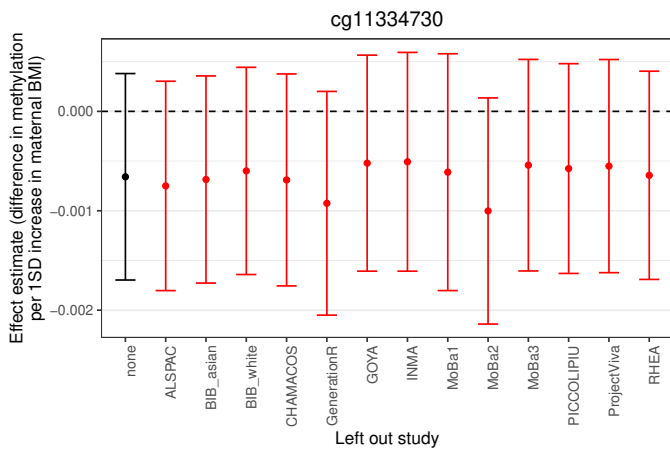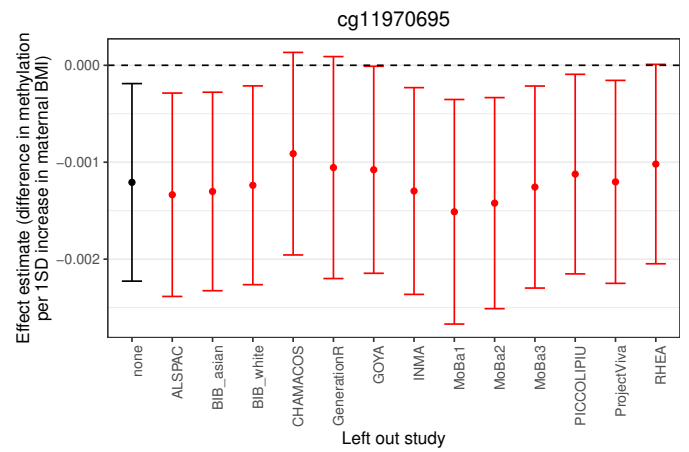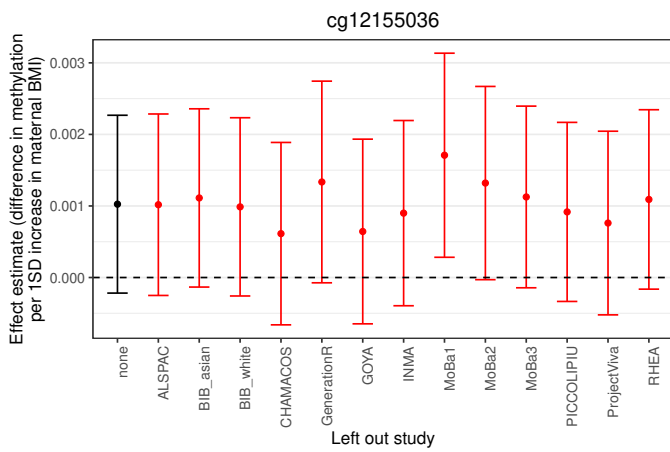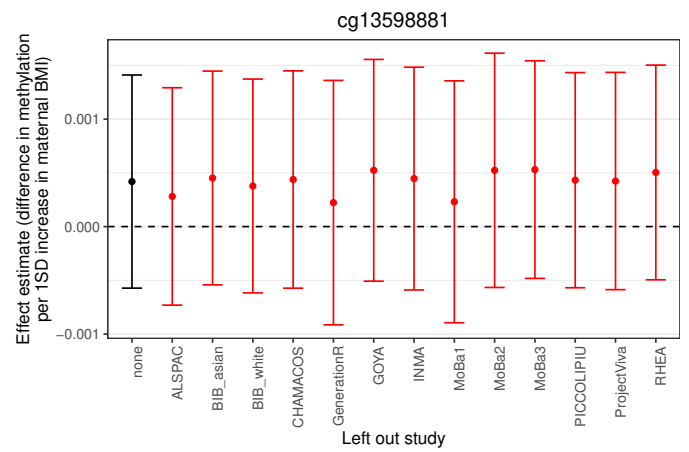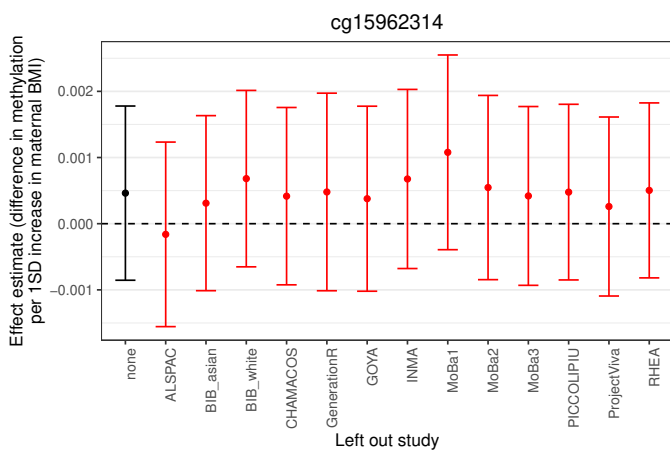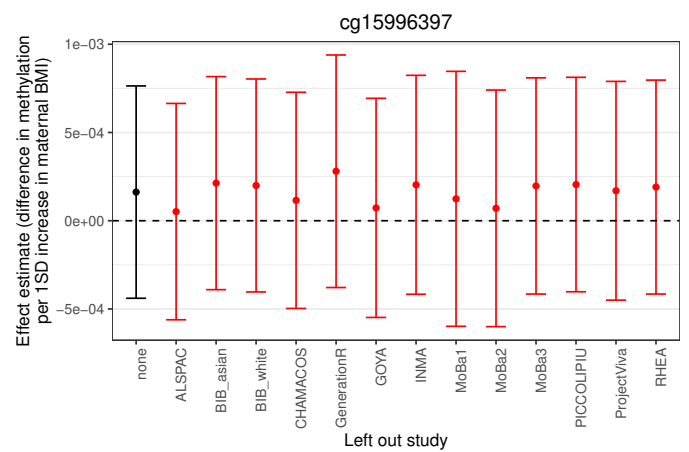



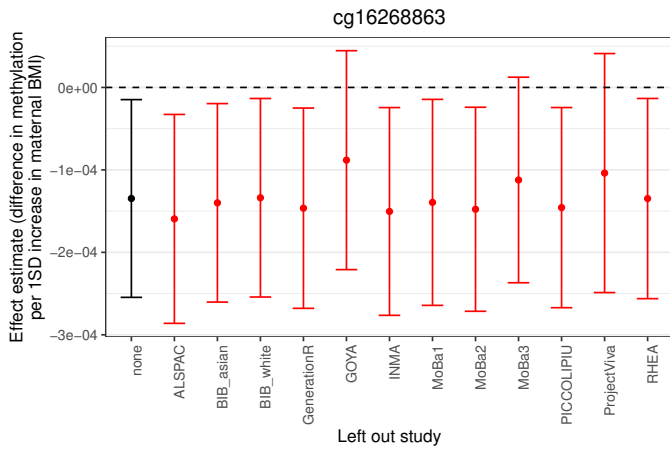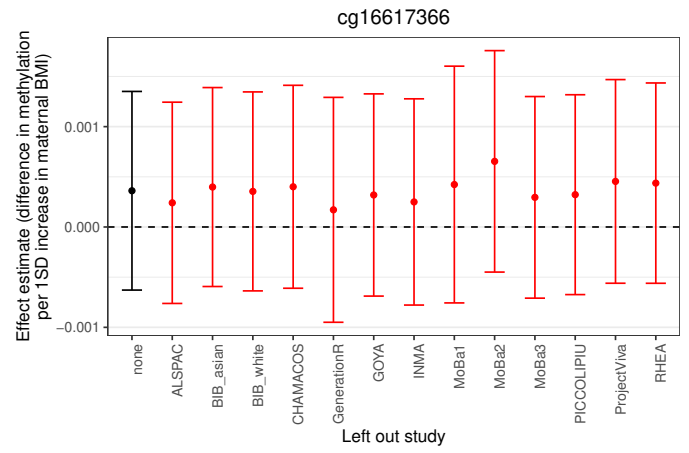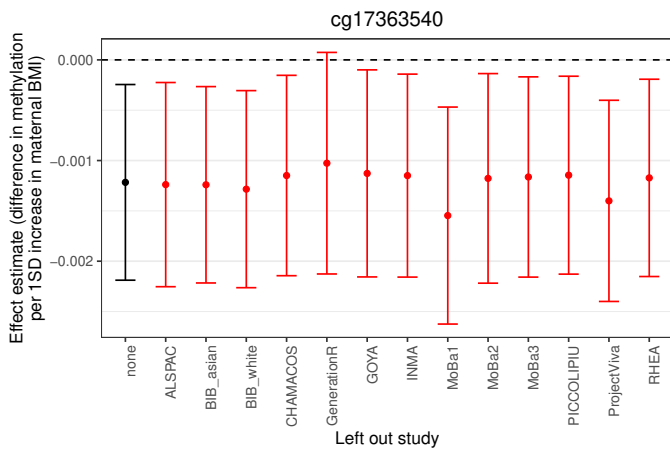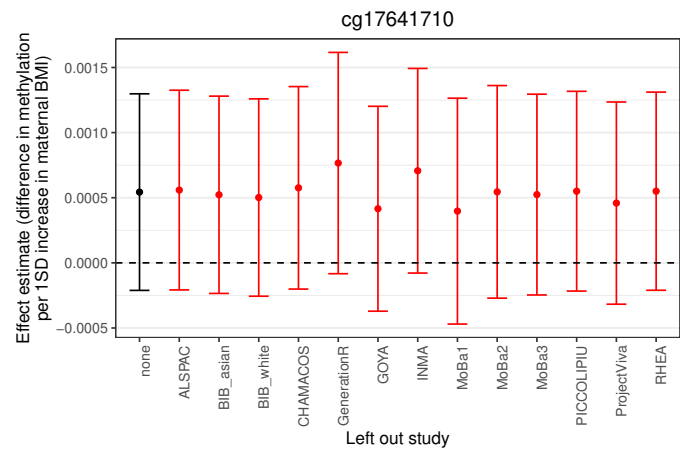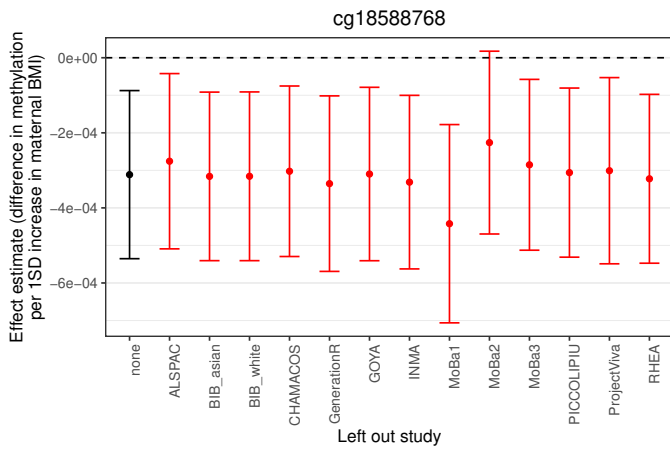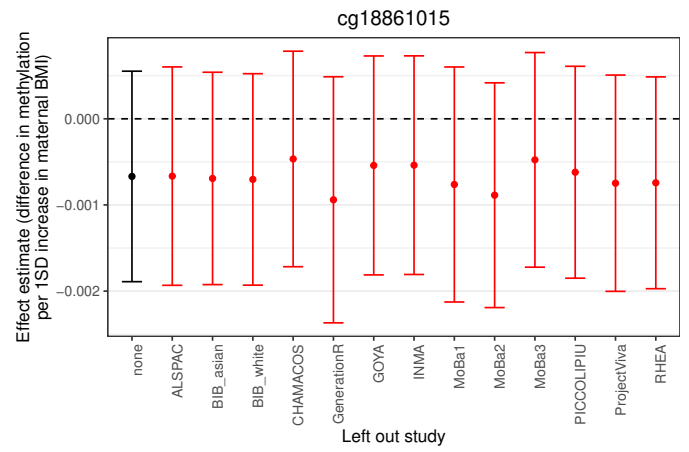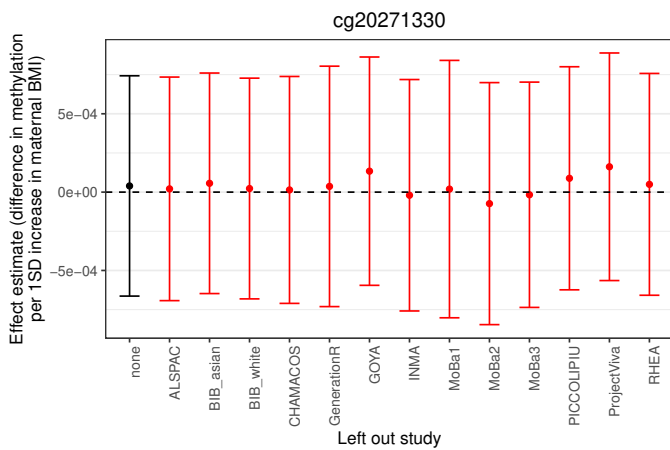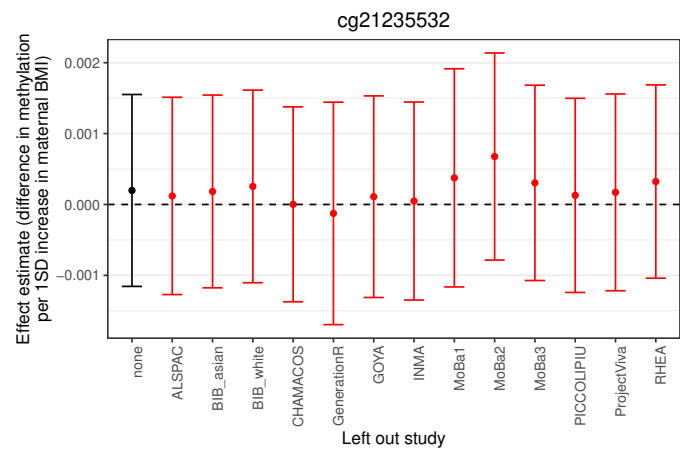

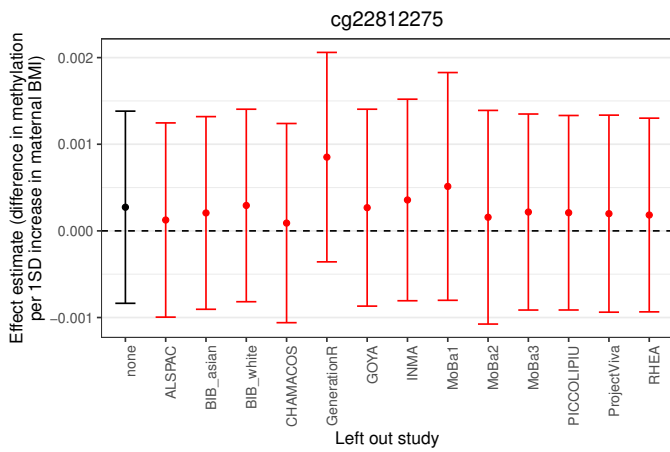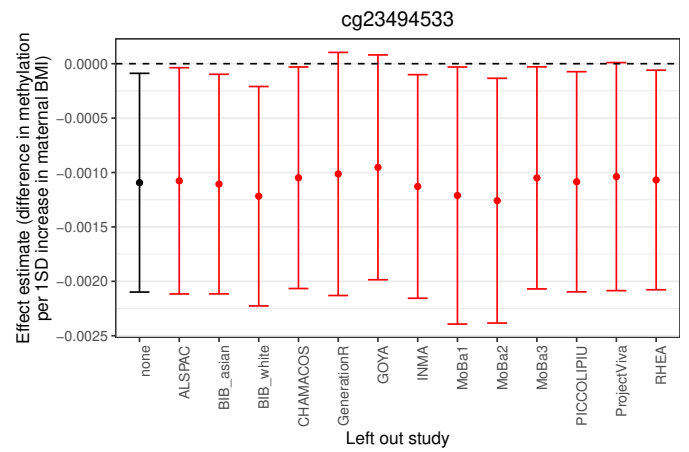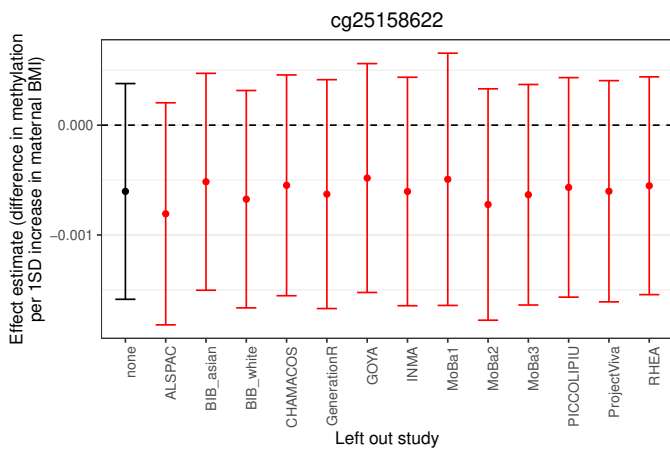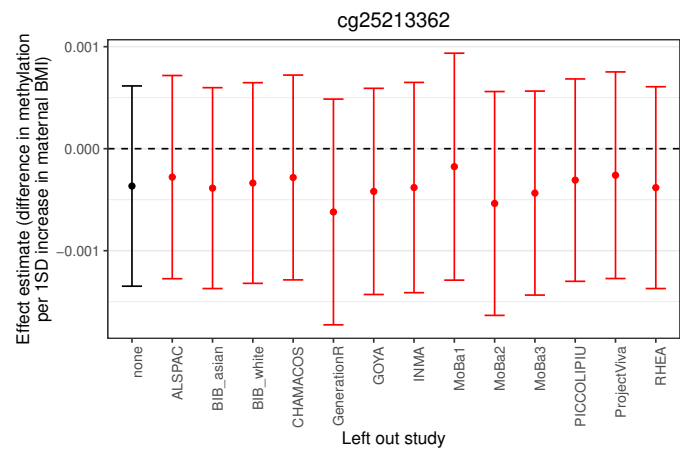

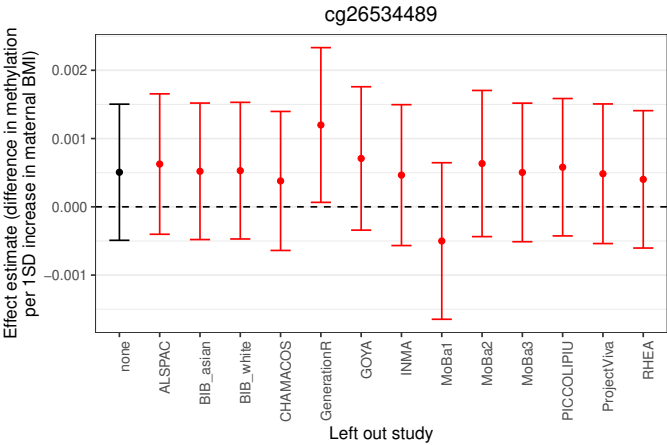

Maternal BMI adjusted for paternal BMI – female offspring  
only: pages 29-31

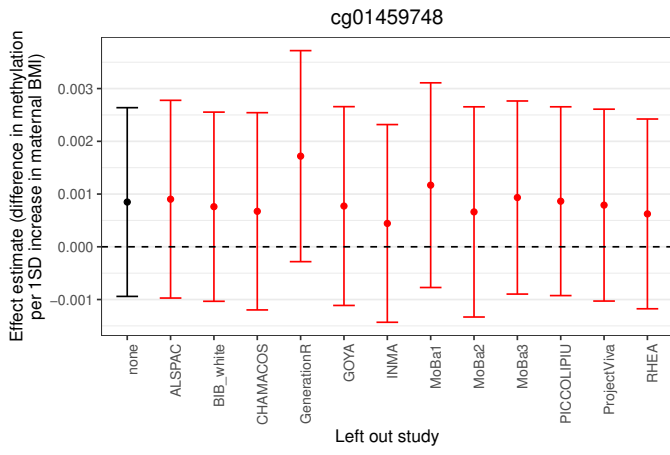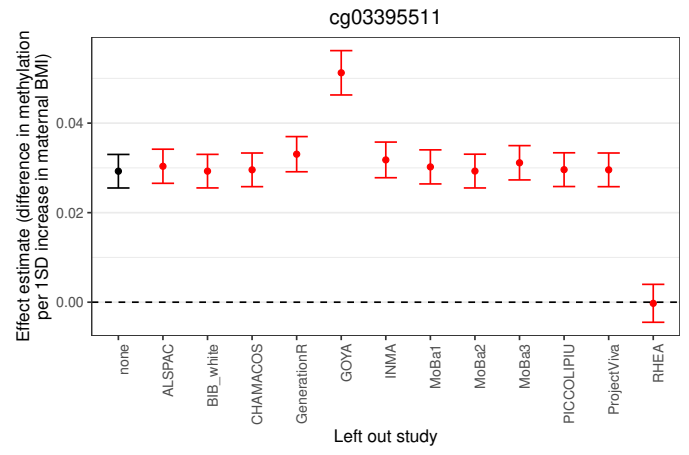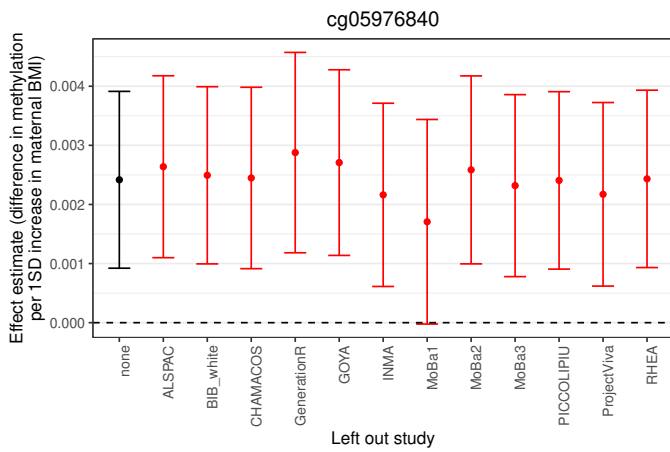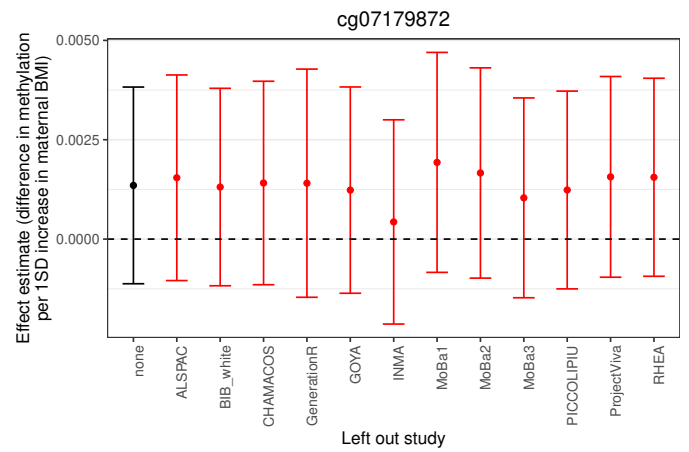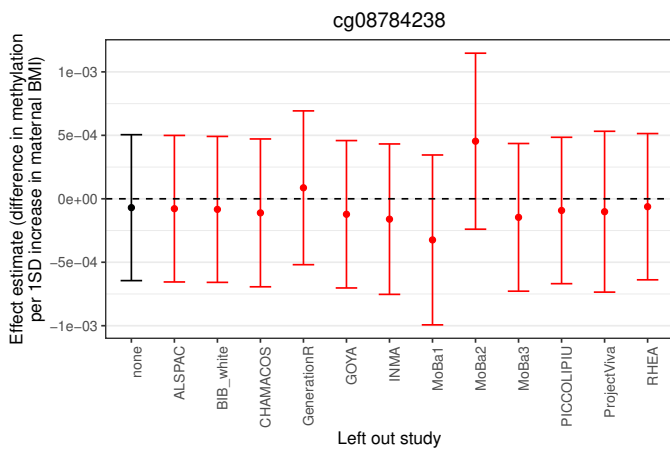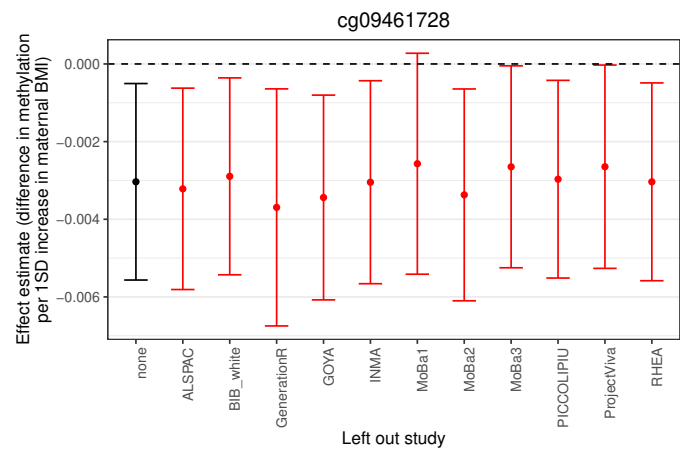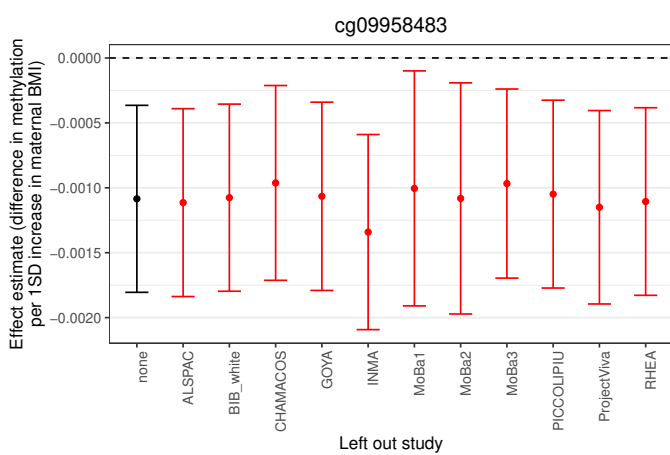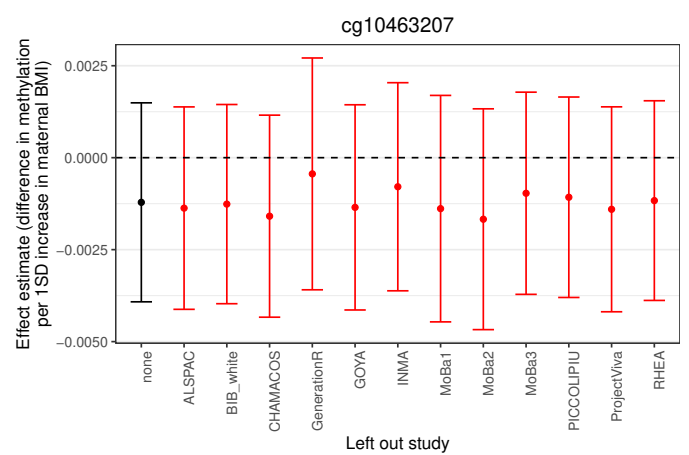

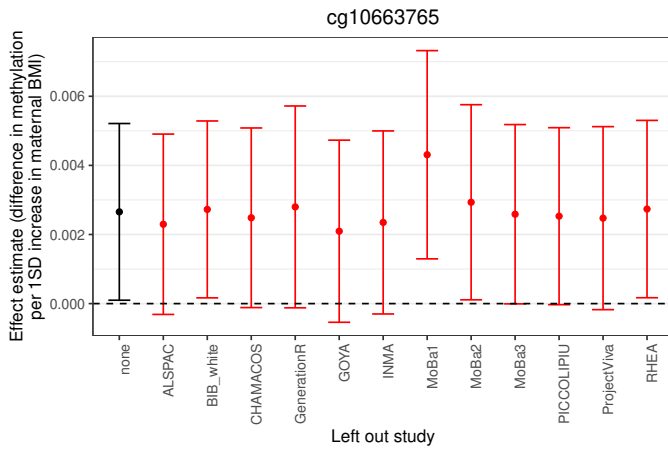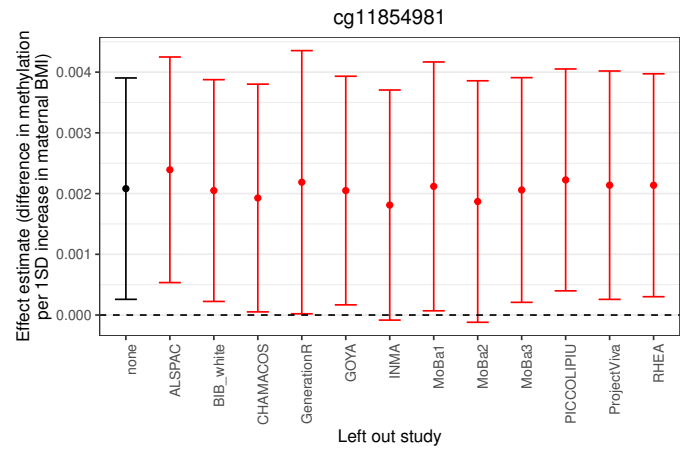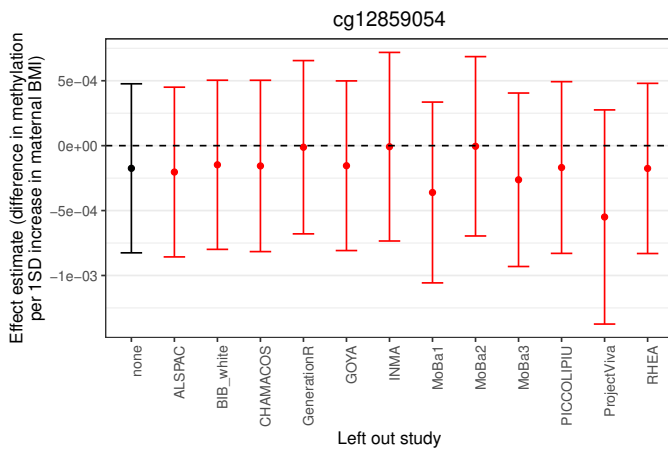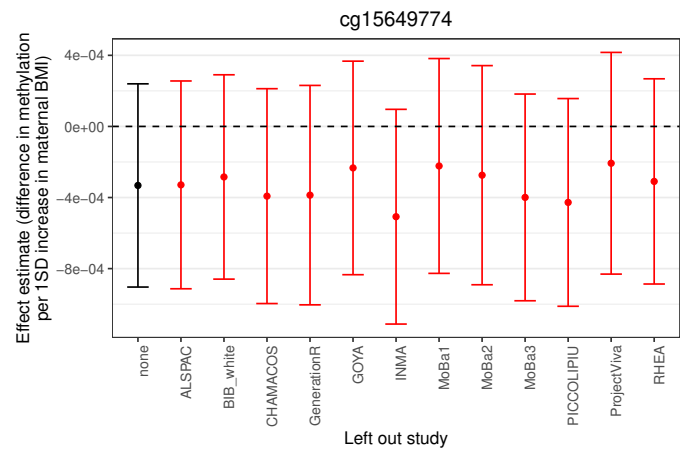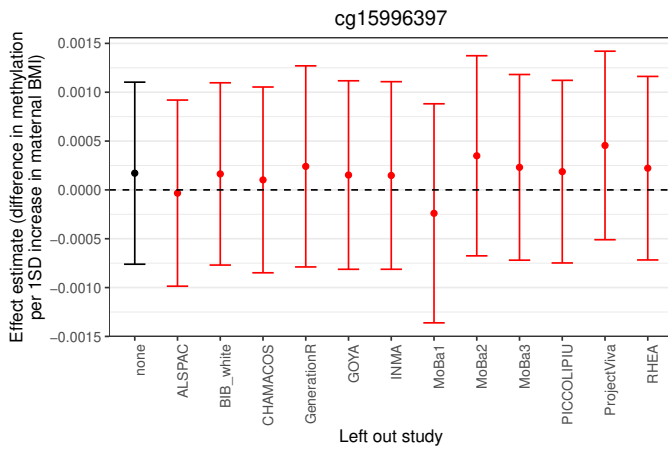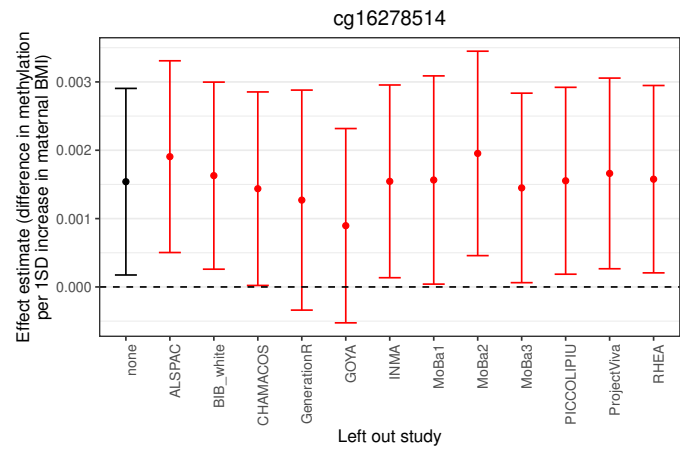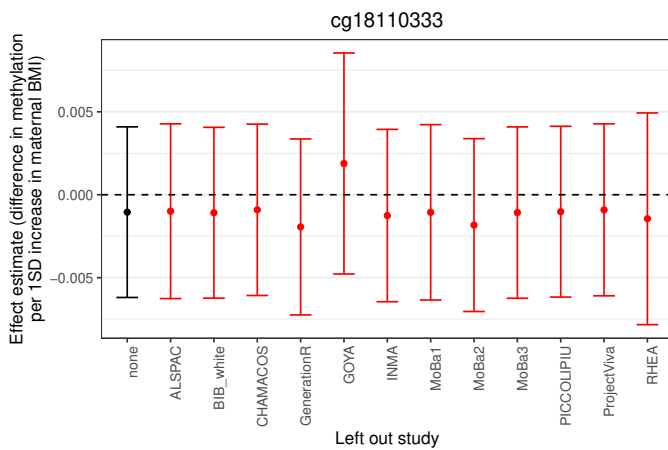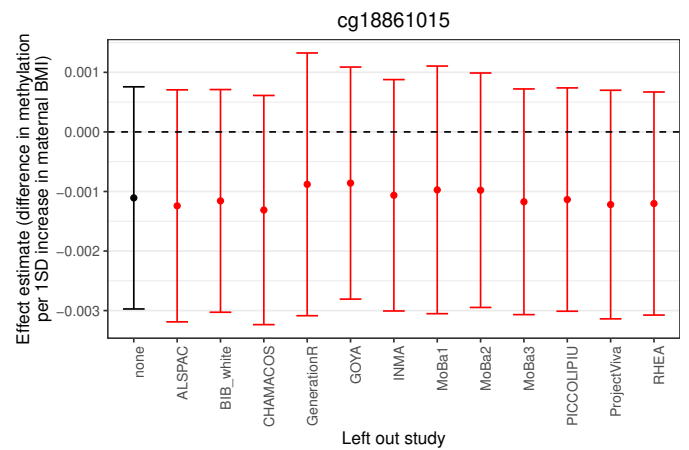

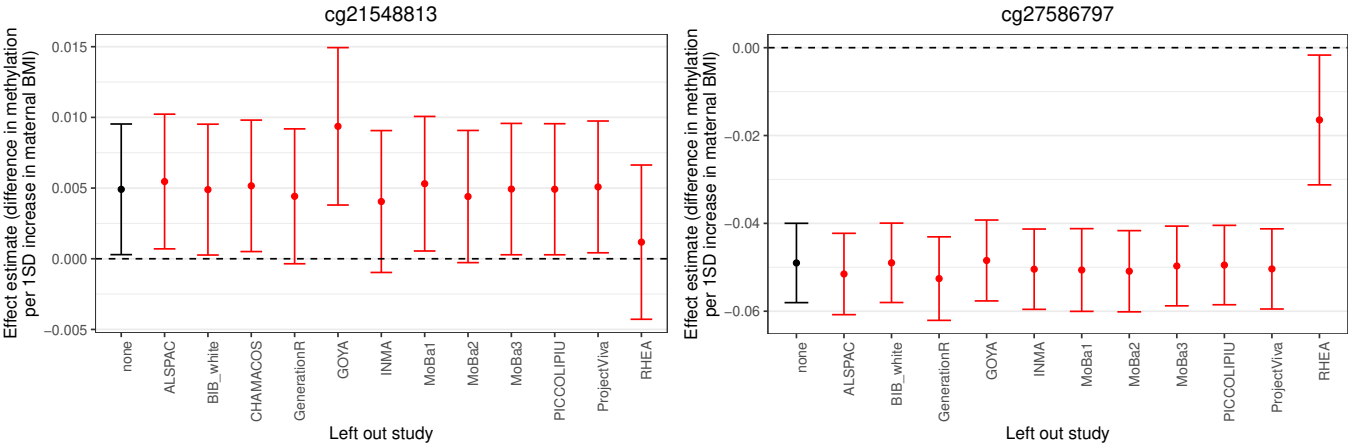

Maternal BMI adjusted for paternal BMI – male offspring  
only: pages 33-34



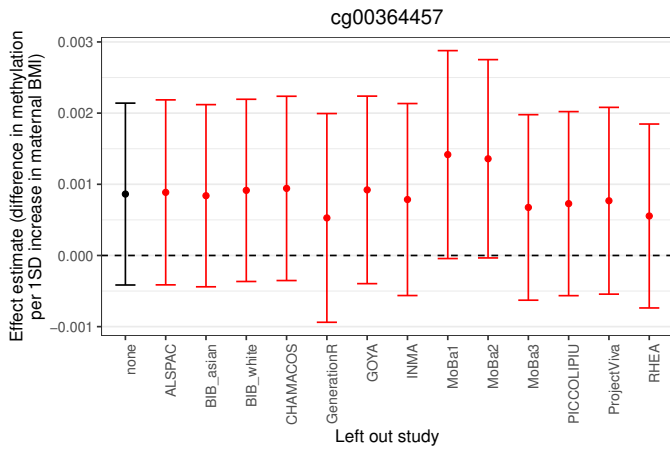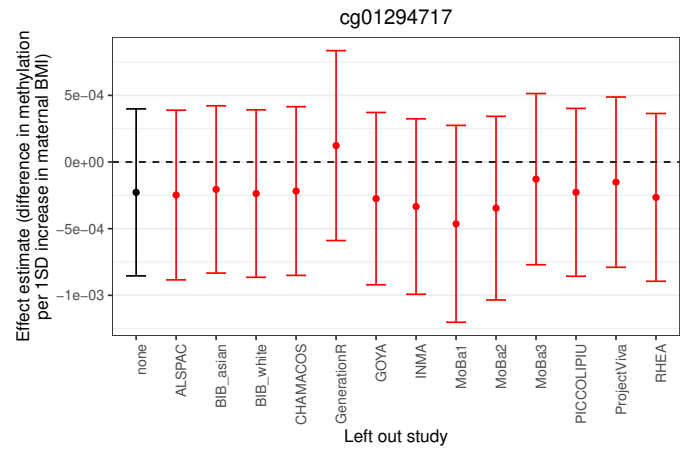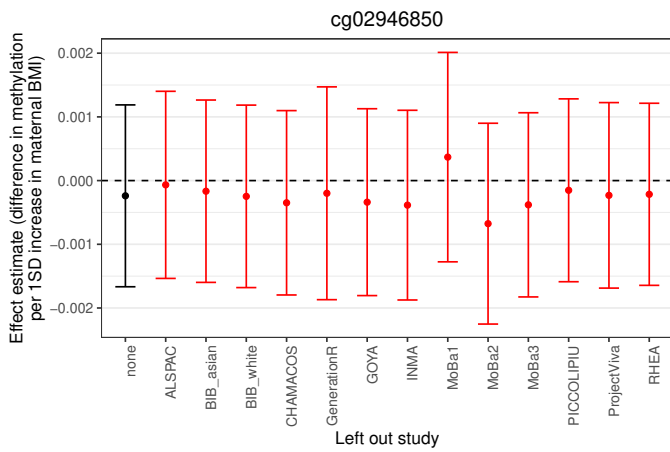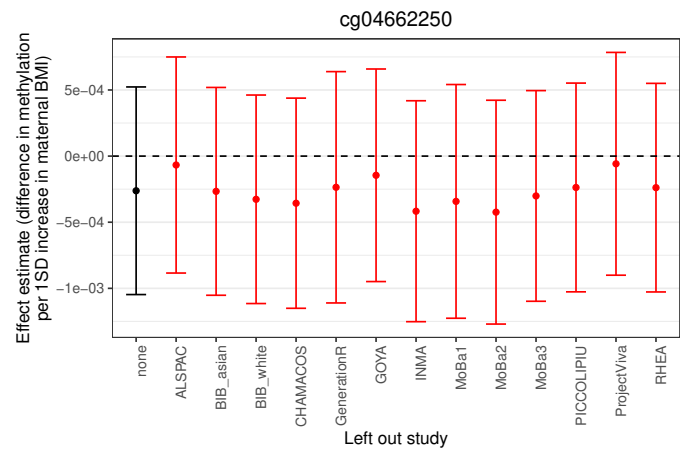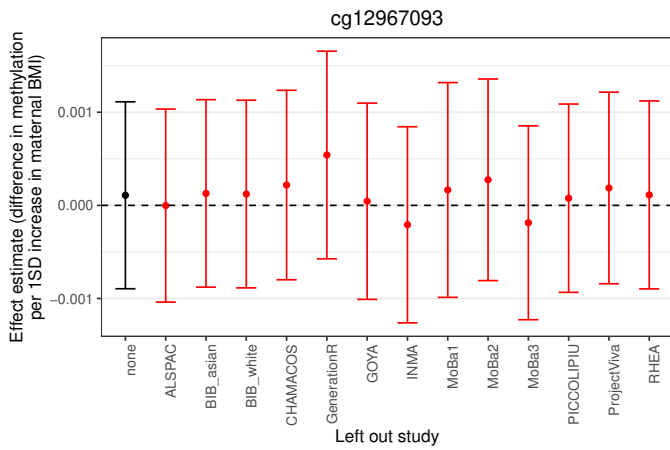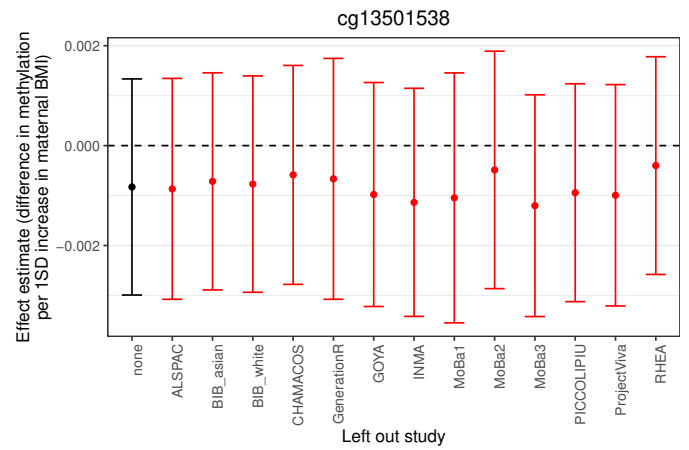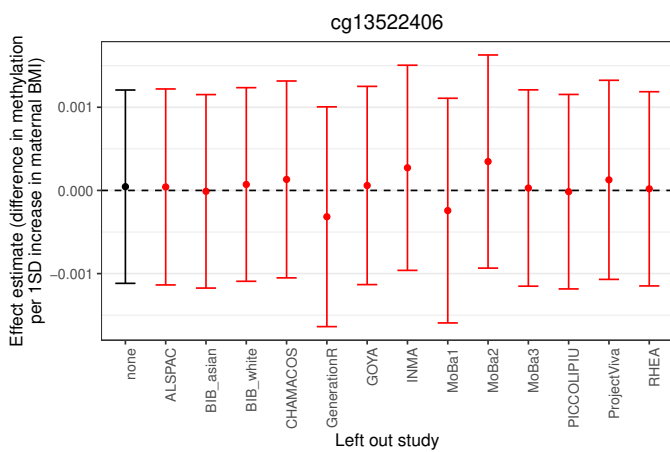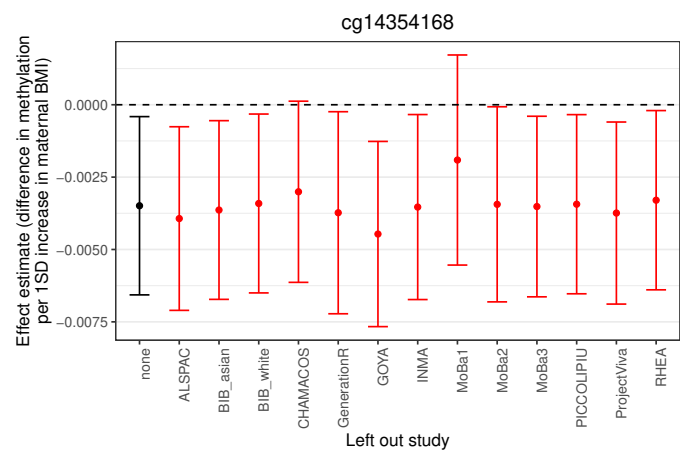

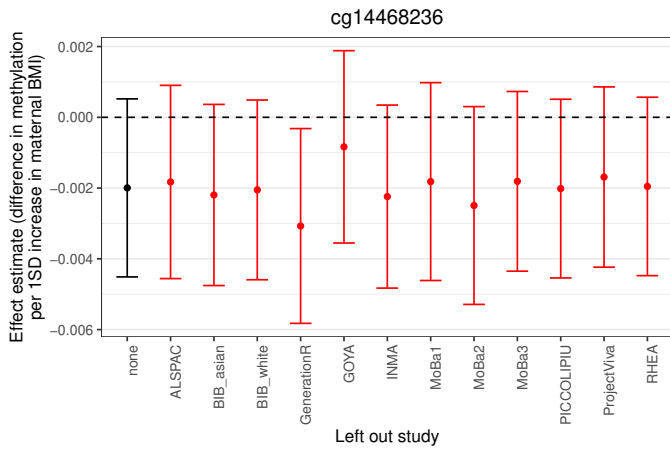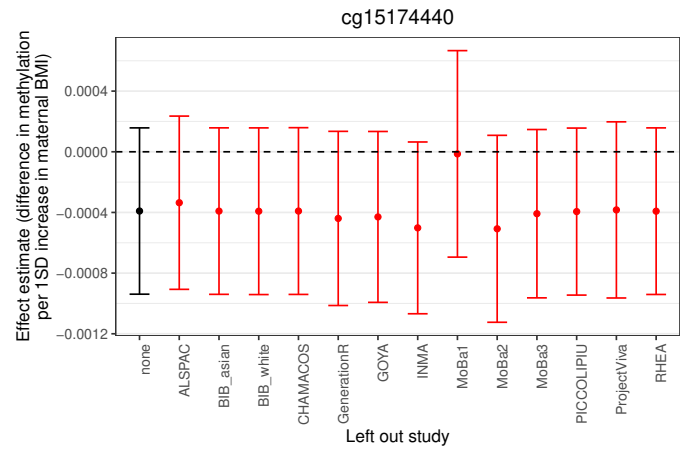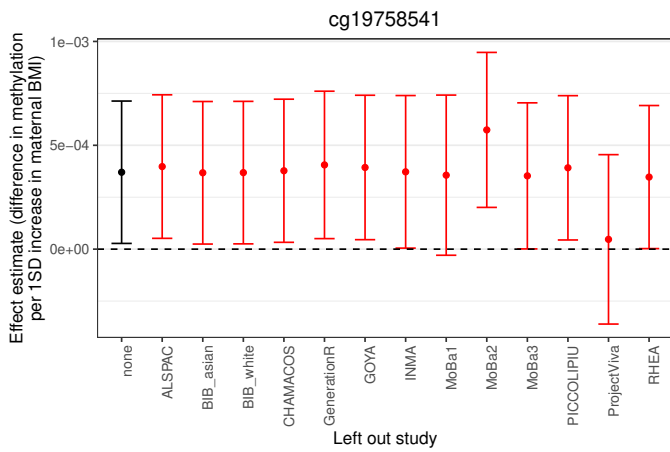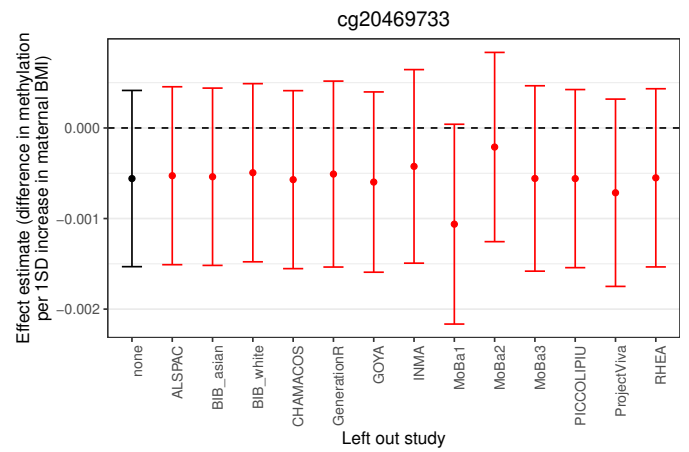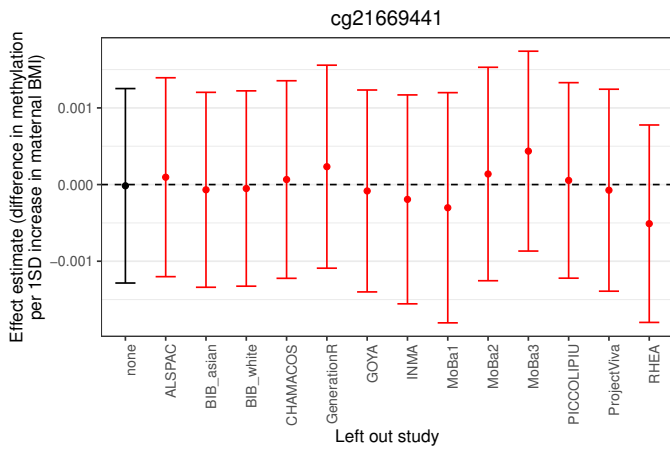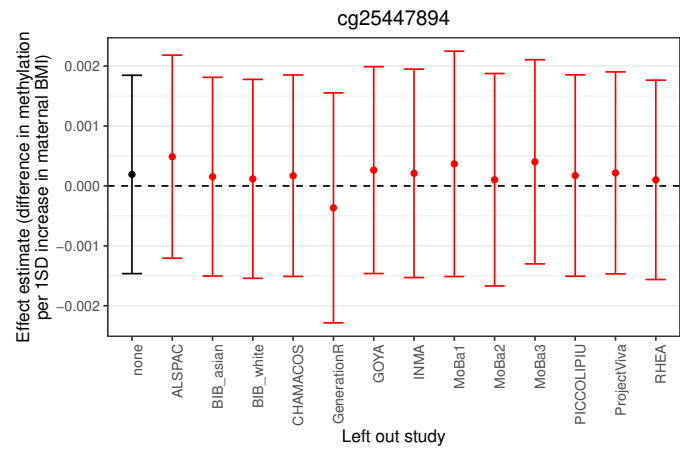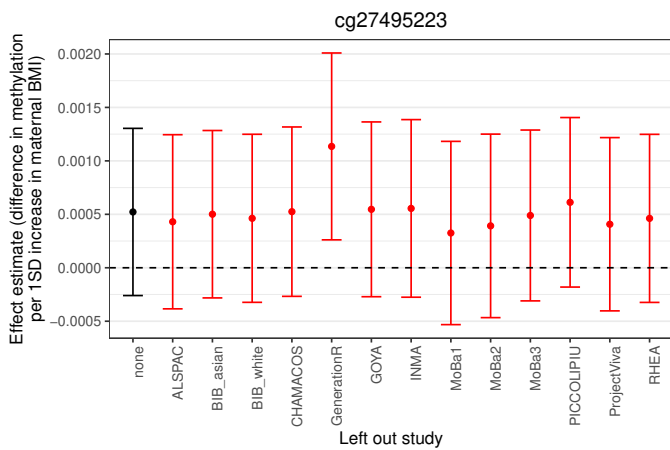

Supplement: dyaa267_supplementary_data.zip [file dyaa267_supplementary_data.zip]
